1                   **Nitrogen competition is the general mechanism underlying cnidarian-**  
2                                           **Symbiodiniaceae symbioses**

3                   Guoxin Cui<sup>1</sup>†\*, Jianing Mi<sup>2</sup>†, Alessandro Moret<sup>1</sup>†, Huawen Zhong<sup>1</sup>, Shiou-Han Hung<sup>1</sup>, Salim Al-  
4                                           Babili<sup>2,3</sup>, Manuel Aranda<sup>1\*</sup>

5  
6                   <sup>1</sup>King Abdullah University of Science and Technology (KAUST), Biological and Environmental Science  
7                   and Engineering Division, Red Sea Research Center, Thuwal 23955-6900, Saudi Arabia

8                   <sup>2</sup>King Abdullah University of Science and Technology (KAUST), Biological and Environmental Science  
9                   and Engineering Division, the BioActives Lab, Center for Desert Agriculture, Thuwal 23955- 6900, Saudi  
10                   Arabia.

11                   <sup>3</sup>King Abdullah University of Science and Technology (KAUST), Biological and Environmental Science  
12                   and Engineering Division, the Plant Science Program, Thuwal 23955- 6900, Saudi Arabia.

13                   †These authors contributed equally to this work

14                   \*Corresponding author. Guoxin Cui ([guoxin.cui@kaust.edu.sa](mailto:guoxin.cui@kaust.edu.sa)) and Manuel Aranda  
15                   ([manuel.aranda@kaust.edu.sa](mailto:manuel.aranda@kaust.edu.sa))

17     **Abstract**

18     Symbiotic associations with Symbiodiniaceae have evolved independently across a diverse range of  
19     cnidarian taxa including reef-building corals, anemones and jellyfish, yet the molecular mechanisms  
20     underlying their regulation and repeated evolution are still elusive. Here we show that despite their  
21     independent evolution, cnidarian hosts employ the same mechanism of symbiont control in which  
22     symbiont-derived glucose is used to assimilate nitrogenous waste via amino acid biosynthesis to limit the  
23     availability of nitrogen to the symbionts. In this metabolic interaction, glucose significantly reduces  
24     symbiont density while ammonium promotes symbiont proliferation. We show that glucose-derived <sup>13</sup>C  
25     and ammonium-derived <sup>15</sup>N are co-incorporated into amino acids by the hosts. Metabolic differences  
26     between the hosts further suggest that corals are more susceptible to environmental stress and symbiosis  
27     breakdown due to their increased energy demands to satisfy calcification. Our results reveal the general  
28     metabolic interaction underlying these symbioses and provide a parsimonious explanation for their repeated  
29     evolution.

30     **Keywords:** Cnidarian-Symbiodiniaceae symbiosis, Nitrogen competition, Repeat evolution, Coral,  
31     Carbon-nitrogen balance

32

## 33 **Introduction**

34 The mutualistic symbiotic relationship between marine invertebrates and dinoflagellates in the family  
35 Symbiodiniaceae is one of the most common eukaryote-eukaryote endosymbiosis in our oceans and  
36 fundamental to coral reef ecosystems (Stat et al., 2006). The symbiotic association with Symbiodiniaceae  
37 provides the hosts with photosynthetically derived carbohydrates and allows them to thrive in the  
38 oligotrophic environments of tropical oceans. Symbiodiniaceae symbioses have evolved convergently  
39 across a broad range of marine phyla, including single-celled foraminifera, sponges, cnidarians,  
40 platyhelminths, and mollusks (LaJeunesse et al., 2018; Melo Clavijo et al., 2018). Among these phyla,  
41 cnidarians have arguably evolved the largest diversity in Symbiodiniaceae symbioses. Two out of the four  
42 cnidarian subphyla that diverged >700 Mya, Anthozoa and Scyphozoa, have species that evolved symbiotic  
43 relationships with Symbiodiniaceae (Colley and Trench, 1983; Davy et al., 2012; Furla et al., 2005).  
44 However, anthozoans, which include octocorals, anemones, and reef-building corals, among others, have  
45 evolved the highest diversity in Symbiodiniaceae relationships. Of all the symbiotic cnidarians, reef-  
46 building corals are the best-studied due to their economical and ecological importance (Stat et al., 2008).  
47 The evolution of symbiosis turned the ancestor of corals into the ecosystem founders they are today by  
48 enabling them to build the framework of one of the most productive and biodiverse ecosystems on our  
49 planet, coral reefs. Unraveling the molecular mechanisms underpinning these relationships will not only  
50 provide valuable insight into the mechanisms underlying the regulation of these associations and their  
51 convergent evolution but also provide critical information for our understanding of its stress-related  
52 breakdown known as bleaching.

53

## 54 **Results**

### 55 **Mechanisms of host-symbiont metabolic interactions**

56 The repeated evolution of these symbioses across such a diverse range of phyla suggests that a common  
57 mechanism might exist, which regulates the interactions between hosts and symbionts. These interactions

58 need to allow for bidirectional nutrient exchange to establish an environment conducive to symbiont growth  
59 and function, but at the same time provide a mechanism to regulate and control symbiont proliferation  
60 within host tissues. Several possible mechanisms have been proposed and investigated in the past, including  
61 specific protein machinery that allows the host to directly interfere with the symbiont cell cycle (Dimond  
62 et al., 2013; Tivey et al., 2020), to host-controlled preferential expulsion of dividing symbionts  
63 (Baghdasarian and Muscatine, 2000), as well as more simple nutrient-flux-based models (Cui et al., 2019;  
64 Smith and Muscatine, 1999). However, the repeated evolution of these relationships across such a vast  
65 range of taxonomic groups suggests that the establishment of these symbioses might not require the *de novo*  
66 evolution of complex protein machinery. Hence, simple models requiring less evolutionary novelties should  
67 be considered more likely. Previous studies have suggested that symbiont proliferation might indeed be  
68 controlled via the limitation of essential nutrients such as nitrogen (Cui et al., 2022; Cui et al., 2019;  
69 Falkowski et al., 1993; Wang and Douglas, 1998; Xiang et al., 2020). Based on these findings, we proposed  
70 a simple metabolic model in which the host uses the photosynthesis-derived sugar provided by the  
71 symbionts to assimilate its own waste nitrogen via the GS/GOGAT cycle and subsequently incorporates it  
72 into non-essential amino acids [**Figure 1**, see also Cui et al. (2019)]. The model is based on a simple  
73 metabolic interaction that allows the host to convert sugar and waste nitrogen into valuable amino acids  
74 while simultaneously providing a mechanism for symbiont control without the requirement of additional  
75 means to regulate symbiont cell numbers.

76

### 77 **Glucose and ammonium modulate symbiont density**

78 To determine if this model represents the general mechanism underlying the symbioses across different  
79 cnidarians, we tested it in three distantly related species that evolved symbiosis independently, the reef-  
80 building coral *Stylophora pistillata*, the sea anemone *Exaiptasia diaphana*, and the upside-down jellyfish  
81 *Cassiopea andromeda*. These species are representatives of three different cnidarian classes that  
82 evolutionary diverged >700 Mya ago (Park et al., 2012; Wang et al., 2021).

83 Based on our proposed metabolic model (**Figure 1**), we hypothesized that symbiont cell density in  
84 symbiotic hosts is tightly controlled through a negative feedback response driven by the availability of  
85 glucose and ammonium. In this self-regulating system, increasing glucose levels are expected to promote  
86 the capacity of the host to assimilate ammonium and, thus, to limit the availability of nitrogen to the  
87 symbionts. This reduction in nitrogen availability is expected to result in a decrease of the symbiont cell  
88 density over time since the reduced nitrogen level would not be sufficient to support the original number of  
89 symbionts. Conversely, the symbiont cell density is expected to increase when the availability of  
90 ammonium in the system increases.

91 To test this hypothesis in the three selected cnidarian species, we manipulated the levels of glucose and  
92 ammonium in their surrounding environment and analyzed their responses on the level of symbiont density.  
93 As predicted by our model, the supplementation with glucose resulted in significantly lower symbiont cell  
94 densities in the reef-building coral *Stylophora pistillata* (**Figure 2A**, unpaired two-tailed  $t$  test,  $p =$   
95  $0.000003$ ), the sea anemone *Exaiptasia diaphana* (**Figure 2B**,  $p = 0.008$ ), and the upside-down jellyfish  
96 *Cassiopea andromeda* (**Figure 2C**,  $p = 0.039$ ). Conversely, symbiont cell densities increased significantly  
97 in *S. pistillata* ( $p = 0.002$ ) and *E. diaphana* ( $p = 0.025$ ), when ammonium was supplied, while *C. andromeda*  
98 showed an increasing, but nonsignificant trend ( $p = 0.382$ ) (**Figure 2**). Interestingly, experiments using  
99 both glucose and ammonium combined did not show the reduction in symbiont density observed in response  
100 to glucose alone (**Figures S1 and S2**). This finding confirms that the observed reduction in symbiont  
101 density in response to glucose provision is indeed a direct response and not an unspecific stress response  
102 that induces bleaching. To provide additional confirmation of these responses in corals, we repeated these  
103 experiments in the coral *Acropora hemprichii* which showed the same responses as *S. pistillata* (**Figure**  
104 **S2**).

105  
106 **Host-dependent ammonium assimilation and amino acid synthesis**

107 The observed changes in symbiont cell densities in response to the availability of glucose and ammonium  
108 aligned with the predictions based on our metabolic model. Hence, we further hypothesized that host-driven  
109 ammonium assimilation via amino acid biosynthesis is the molecular pivot underlying symbiont population  
110 control. To evaluate this hypothesis, we performed stable isotope tracer analysis using  $^{13}\text{C}$  labeled glucose  
111 and  $^{15}\text{N}$  labeled ammonium by ultra-high-performance liquid chromatography-high resolution mass  
112 spectrometry (UHPLC-HR-MS).

113 Using UHPLC-HR-MS, we examined the isotopic profiles of metabolic intermediates of the GS/GOGAT  
114 and amino acid biosynthesis pathways from host animals supplemented with  $^{13}\text{C}_6$ -glucose,  $^{15}\text{N}$ -ammonium,  
115 and combined  $^{13}\text{C}_6$ -glucose and  $^{15}\text{N}$ -ammonium. The high-resolution mass spectra acquired with enhanced  
116 resolution to 280,000  $m/\Delta m$  (at  $m/z = 200$ ), facilitated unambiguous identification and distinction of  
117 targeted compounds with different stable  $^{13}\text{C}$  and  $^{15}\text{N}$  isotopic compositions. Here we present the  
118 identification of glutamine as an example (**Figure 3A**). The natural isotopic distribution of glutamine  
119 standard shows two clear isotopic ions increasing by 1 amu, which are recognized as  $^{13}\text{C}_4\text{H}_{10}\text{N}_2\text{O}_3^+$  ion  
120 at  $m/z$  148.07948 and  $^{15}\text{NNO}_3^+$  ion at  $m/z$  148.07321, respectively. In addition, their intensities are  
121 about 5% and 1% of the monoisotopic ion  $^{12}\text{C}_4\text{H}_{10}\text{N}_2\text{O}_3^+$ , respectively. Compared to glutamine standard,  
122 the mass spectrum of endogenous glutamine of *E. diaphana* incubated with both  $^{13}\text{C}_6$ -glucose and  $^{15}\text{N}$ -  
123 ammonium indicates the presence of various glutamine molecule compositions containing different  
124 amounts of  $^{13}\text{C}$  and  $^{15}\text{N}$  atoms (**Figure 3A**). Following this strategy, we profiled metabolites including 3-  
125 phosphohydroxypyruvate, glutamate, glutamine, O-phospho-*L*-serine, serine, and glycine, which are  
126 associated with GS/GOGAT-mediated ammonium assimilation and subsequent amino acid biosynthesis in  
127 *S. pistillata*, *E. diaphana*, and *C. andromeda* (**Figures 3B, S3-S25**).

128 For further comparison of each metabolite with different nitrogen and carbon isotopic compositions from  
129 the different supplementation experiments, we first normalized the levels of isotopic ions to the abundance  
130 of the natural monoisotopic ion and then summarized them according to their isotopic compositions ( $^{12}\text{C}^{14}\text{N}$ ,  
131  $^{13}\text{C}^{14}\text{N}$ ,  $^{12}\text{C}^{15}\text{N}$ , and  $^{13}\text{C}^{15}\text{N}$ ).

132 In animals supplemented with  $^{13}\text{C}_6$ -glucose, the proportion of  $^{13}\text{C}$ -containing 3-phosphohydroxypyruvate,  
133 one of the intermediate metabolites derived from glycolysis, increased dramatically from the natural level  
134 (< 5%) to >50% (mean percentage  $\pm$  SE, 86.89%  $\pm$  0.88% in *S. pistillata*, 53.43%  $\pm$  6.97% in *E. diaphana*,  
135 and 69.75%  $\pm$  2.46% in *C. andromeda*). Similar isotopic results were observed in downstream metabolic  
136 intermediates of the amino acid biosynthesis pathway via the GS/GOGAT cycle (**Figure 3B**).

137 The provision of  $^{15}\text{N}$ -ammonium in combination with  $^{13}\text{C}_6$ -glucose further increased the carbon isotope  
138 incorporation rate across all the intermediates in *E. diaphana* (84.53%  $\pm$  1.15%,  $p = 0.0046$ ) and *C.*  
139 *andromeda* (91.20%  $\pm$  1.29%,  $p = 0.00039$ ), while there was no further increase observed for *S. pistillata*  
140 (84.43%  $\pm$  2.97%,  $p = 0.45$ ). In addition, significant increases were also observed for  $^{15}\text{N}$  incorporation  
141 rates. In particular, most of the  $^{15}\text{N}$  isotope was identified in both  $^{13}\text{C}$ - and  $^{15}\text{N}$ -containing metabolites  
142 ( $^{13}\text{C}^{15}\text{N}$ ) from animals with the combined treatment, while only a small proportion of the  $^{15}\text{N}$  isotope ended  
143 up in  $^{12}\text{C}^{15}\text{N}$  compounds (**Tables S1-S4**), which indicates that most of the  $^{15}\text{N}$  was assimilated through the  
144 incorporation into carbon backbones derived from the  $^{13}\text{C}_6$ -glucose provided. This finding further supported  
145 the hypothesis that the metabolization of glucose to 3-phosphohydroxypyruvate produces the carbon  
146 backbones required for ammonium assimilation through the GS/GOGAT cycle.

147 To further determine if the observed assimilation of ammonium is driven by the host animals, we examined  
148 the incorporation of  $^{13}\text{C}$  and  $^{15}\text{N}$  isotopes in aposymbiotic *E. diaphana* following the same experimental  
149 design (**Figure 3B**). Aligned with the patterns observed in symbiotic animals, we found that 92.65%  $\pm$   
150 0.79% of the isolated 3-phosphohydroxypyruvate contained  $^{13}\text{C}$  isotope in aposymbiotic sea anemones.  
151 This proved that the  $^{13}\text{C}$  isotope was integrated directly through the uptake and consumption of  $^{13}\text{C}_6$ -glucose  
152 by the host. Moreover, the downstream intermediate metabolites showed a significant proportion of  $^{15}\text{N}$ -  
153 containing compounds ( $^{12}\text{C}^{15}\text{N}$  and  $^{13}\text{C}^{15}\text{N}$ ), especially in the  $^{13}\text{C}^{15}\text{N}$  form (**Figure 3B, Tables S1-S4**). This  
154 provided further proof that the animal hosts are able to assimilate the provided ammonium using carbon  
155 backbones derived from glucose metabolism, as hypothesized. The similar patterns observed between  
156 symbiotic and aposymbiotic sea anemones provide additional proof that the incorporation of ammonium  
157 into amino acids is driven by the host animals and that this process does not require the presence of

158 symbionts as long as carbon backbones are provided. Although the presence of symbionts increased the co-  
159 incorporation of  $^{13}\text{C}$  and  $^{15}\text{N}$  in the combined treatment (**Figure 3B, Tables S1-S4**), the incorporation rates  
160 between symbiotic and aposymbiotic anemones were not significantly different ( $t = -0.40, p = 0.69$ ).

161

### 162 **Metabolic destinations for glucose taken up by corals**

163 Besides validating our hypothesis of host-driven ammonium assimilation as a universal mechanism in  
164 cnidarian symbioses, we also noticed that corals appear to differ in their use of glucose compared to sea  
165 anemones and jellyfish. To track the metabolic flux of  $^{13}\text{C}$  in our target GS/GOGAT pathway, we calculated  
166 the proportional changes relative to total carbon atoms across the pathway metabolites (**Figure 4**). *S.*  
167 *pistillata* showed significantly higher  $^{13}\text{C}$  uptake and metabolization but significantly lower  $^{13}\text{C}$  integration  
168 into downstream metabolites compared to *E. diaphana* and *C. andromeda* when supplemented with  $^{13}\text{C}_6$ -  
169 glucose (**Figure 4A**). The relative proportion of  $^{13}\text{C}$  exhibited a sharper decrease over the whole pathway,  
170 as reflected in a significantly steeper slope based on a generalized linear model (**Figure S26**; *S. pistillata*  
171 vs *E. diaphana*,  $-0.112$  vs  $-0.047$ ,  $p = 0.024$ ; *S. pistillata* vs *C. andromeda*,  $-0.112$  vs  $-0.062$ ,  $p = 0.043$ ).  
172 These suggested that corals use relatively more glucose for purposes other than amino acid biosynthesis.  
173 Furthermore, the simultaneous provision of  $^{15}\text{N}$ -ammonium and  $^{13}\text{C}_6$ -glucose did not increase the uptake of  
174  $^{13}\text{C}$  or its integration into amino acids in *S. pistillata* as observed for *E. diaphana* or *C. andromeda* (**Figures**  
175 **3B and 4B**). Conversely, sea anemones and jellyfish showed a higher relative capacity to integrate  $^{13}\text{C}$  into  
176 amino acids and this capacity was further enhanced when additional ammonium was provided.

177

### 178 **Discussion**

179 Endosymbiotic relationships are the most intimate form of symbiosis, as the symbionts are maintained  
180 within the host's cells (Nowack and Melkonian, 2010). Naturally, this intimacy requires mechanisms that  
181 allow providing mutual advantages to both parties in order to maintain an evolutionary stable relationship  
182 while discouraging or penalizing parasitic traits that could destabilize the relationship and trigger a Red



183 Queen's race between host and symbiont (Van Valen, 1973). Oftentimes, this is prevented through the  
184 evolution of mechanisms that provide the host with means to control or limit symbiont proliferation in order  
185 to prevent the overproliferation of symbionts at the host's expense (Bull and Rice, 1991; Sachs et al., 2010).  
186 Here, we tested our hypothesis that the widespread symbiotic relationships between cnidarians and their  
187 dinoflagellate symbionts in the family Symbiodiniaceae are based on a simple metabolic model. This basic  
188 metabolic interaction allows cnidarian hosts to control symbiont proliferation while at the same time  
189 maximizing their capacity to assimilate and recycle scarce nitrogen into valuable amino acids. This  
190 metabolic interaction also provides a parsimonious explanation for the repeated evolution of the symbiotic  
191 associations across many cnidarian taxa, and potentially also other marine invertebrates.

192 While our results clearly show that all four hosts employ ammonium assimilation as a means to control  
193 symbiont proliferation, they also revealed important differences between the different cnidarian hosts and  
194 their use of glucose and ammonium. These differences have critical implications for the ability of the hosts  
195 to control their symbiont populations and, thus, stabilize the symbiosis. Specifically, we found that the rates  
196 at which these metabolites are taken up and metabolized differ substantially between the taxa studied, with  
197 the coral *S. pistillata* showing the highest uptake of  $^{13}\text{C}_6$ -glucose but the lowest relative incorporation rate  
198 of  $^{13}\text{C}$  into  $^{15}\text{N}$ -containing metabolites. This difference in the incorporation of  $^{13}\text{C}$  likely results from  
199 physiological differences in carbon requirements and utilization. Reef building corals, like *S. pistillata*,  
200 require a significant amount of glucose to meet the energy demands of the calcification processes. The  
201 significantly lower relative incorporation of  $^{13}\text{C}$  in more downstream pathway metabolites in comparison  
202 to anemones and jellyfish indeed suggests that corals use a larger part of the glucose, and the derived carbon  
203 backbones, to meet their energetic demands. Conversely, jellyfish and sea anemones do not calcify and do  
204 thus not have such a physiological demand. Hence, they're able to use more of the glucose provided for the  
205 assimilation of ammonium and subsequent amino acid biosynthesis. In the glucose treatment without  
206 additional ammonium, these non-calcifying species are rather nitrogen-limited as the provided glucose is  
207 sufficient to cover both the energetic demands as well as the assimilation of the ammonium available.  
208 However, the provision of both glucose and ammonium further promoted the uptake of both nutrients from

209 the surroundings and subsequent ammonium assimilation and amino acid biosynthesis i.e. more glucose  
210 was taken up if additional ammonium was provided, which further increased ammonium assimilation and  
211 amino acid biosynthesis.

212 Our results, therefore, imply that coral hosts might have a lower capacity to assimilate ammonium as they  
213 require more glucose to meet their energetic demands, which translates in a lower capacity to control  
214 nitrogen levels and, thus, symbiont proliferation. This lowered capacity could also result in a reduced ability  
215 to buffer imbalances in the availability of glucose and ammonium. This means that the symbiotic  
216 relationship between corals and Symbiodiniaceae is likely more sensitive to metabolic imbalances, i.e.  
217 changes in the fluxes of glucose and ammonium, which can result from reduced translocation of  
218 photosynthates during heat stress (Rädecker et al., 2021; Tremblay et al., 2016). Interestingly, corals (*S.*  
219 *pistillata* and *A. hemprichii*) consistently showed the strongest response to glucose provision with a  
220 dramatic decrease in symbiont density. This fast response suggests that corals might possess a mechanism  
221 to actively reduce symbiont density when alternative carbon sources are available. Such a mechanism might  
222 allow corals to mitigate some of the drawbacks resulting from their reduced ability to control their symbiont  
223 population. In line with this, a recent study suggests that corals might also be able to control ammonium  
224 fluxes to the symbionts by varying the expression level of an ammonium transporter at the symbiosome  
225 membrane (Thies et al., 2022).

226 Unlike the other endosymbiosis that is driven by the complementation of the host's limited metabolic  
227 capabilities (Douglas, 2009; Hoffmeister and Martin, 2003; Mao et al., 2018), our findings suggest that  
228 cnidarian hosts rely rather heavily on the provision of glucose to control their symbiont population. This  
229 host-driven mechanism provides an effective metabolic strategy to gain control over the symbiotic  
230 relationship at the expense of being dependent on symbiont-derived glucose. This paradoxical interaction  
231 in which control over symbiont proliferation requires symbiont derived photosynthates might also explain  
232 the general sensitivity of these relationships to environmental stressors that affect symbiont productivity or  
233 nutrient balance (Baker et al., 2018).

234

## 235 **Materials and Methods**

### 236 **Cnidarian animals**

237 Multiple colonies of the coral *Stylophora pistillata* and *Acropora hemprichii* were collected in the central  
238 Red Sea (Al Fahal Reef, 22°14'54"N 38°57'46"E). The coral colonies were acclimatized in indoor tanks  
239 with constant sediment-filtered Red Sea water in-flow (salinity ~39-40 ppt) for at least three months before  
240 being used in this study.

241 The sea anemone *Exaiptasia diaphana* (strain CC7) was used in this study. Aposymbiotic *E. diaphana*, sea  
242 anemones free of symbionts, were generated following a cold-shock protocol (Cui et al., 2019). Briefly,  
243 animals were treated at 4 °C for 4 h, followed by about 30 days of treatment in 50 µM Diuron with daily  
244 water changes. Aposymbiotic animals were maintained under 12 h:12 h light:dark cycle (see below) to  
245 assure that no residual symbionts were present and analyzed via fluorescence microscopy to further confirm  
246 the absence of algal fluorescence before experimentation. All animals, symbiotic and aposymbiotic, were  
247 kept at 25 °C on a 12 h:12 h light:dark cycle with ~40 µmol photons m<sup>-2</sup>s<sup>-1</sup> of photosynthetically active  
248 radiation and fed with freshly hatched brine shrimp, *Artemia*, approximately three times per week. The  
249 individuals used in this study were kept in such conditions for at least six months.

250 The adult jellyfish *Cassiopea andromeda* were collected from the Red Sea (22°20'23.0"N 39°05'31.1"E).  
251 The breeding pairs then spawned in the laboratory and fertilized in the autoclaved seawater. The embryos  
252 were transferred to a lab incubator at 26 °C and raised until the medusa stage. Different stages of the *C.*  
253 *andromeda*, including polyp, ephyra, and medusa, were raised separately. All animals were maintained in  
254 autoclaved seawater at 26 °C on a 12 h:12 h light:dark cycle with ~40 µmol photons m<sup>-2</sup>s<sup>-1</sup> of  
255 photosynthetically active radiation and fed daily with freshly hatched brine shrimp, *Artemia*.

256

### 257 **Cell density measurement**

258 **Coral.** Cell density changes in response to glucose and ammonium supplementation were measured for two  
259 coral species, *S. pistillata* and *A. hemprichii*, respectively. For each species, 8 branches from different coral

260 colonies were cut for each of the three treatments: the ambient seawater control, 10 mM glucose, and 250  
261  $\mu$ M ammonium chloride (or 10 mM glucose plus 250  $\mu$ M ammonium chloride to test their combining  
262 effects). The coral branches were tied to plastic stands and placed into three transparent Nalgene™ straight-  
263 sided wide-mouth polycarbonate jars (Thermo Fisher Scientific). 250 ml seawater from indoor acclimation  
264 tanks was used to fill up each of the jars and the water was changed every two days with fresh treatments  
265 applied. To ensure efficient gas exchange in these small volumes, we added magnetic stirring bars to the  
266 jars before placing them onto a Cimarec™ i Telesystem Multipoint Stirrer (Thermo Fisher Scientific) with  
267 constant stirring at 300 rpm. The whole setup was placed in an incubator at 25°C with  $\sim$ 80  $\mu$ mol photons  
268  $m^{-2}s^{-1}$  radiation and a 12 h:12 h light:dark cycle. After 12-days of incubation, coral fragments were  
269 airbrushed with a lysis buffer (0.2 M Tris-HCl, pH=7.5; 0.5% Triton-X; 2 M NaCl) to dissociate and lyse  
270 the animal tissues. The tissue lysates were sheared by repeated passage through a 25G needle to release the  
271 symbionts. 500  $\mu$ L of each homogenized sample was centrifuged at 8,000g for 2 minutes at room  
272 temperature.

273 **Sea anemones and jellyfish.** 9 polyps of *E. diaphana* and *C. andromeda* were used for each of the three  
274 treatments: the ambient seawater control, 10 mM glucose, and 250  $\mu$ M ammonium chloride (or 10 mM  
275 glucose plus 250  $\mu$ M ammonium chloride to test their combined effects). The incubation was performed in  
276 6-well plates. 8 ml autoclaved seawater with appropriate treatments was used and refreshed every two days.  
277 After 12-days of incubation, animal polyps were homogenized with the above-mentioned lysis buffer using  
278 a cordless motor mixer (Thermo Fisher Scientific). The tissue homogenates were sheared by repeated  
279 passage through a 25G needle to release the symbionts. 500  $\mu$ L of each homogenized sample was  
280 centrifuged at 8,000g for 2 minutes at room temperature.

281 **Cell counting.** For all the cnidarian animals, symbiont cells in the pellets were counted using a BD  
282 LSRFortessa™ Cell Analyzer (BD Biosciences) based on their chlorophyll fluorescence and forward-  
283 scatter signals. Host proteins in the supernatants were quantified using a Pierce Micro BCA™ Protein Assay  
284 Kit (Thermo Fisher Scientific) according to the manufacturer's recommendations. Cell density was  
285 determined by normalizing the total cell number to total host protein content. The normality of cell density

286 data was tested using the Shapiro-Wilk test followed by Levene's test of homogeneity of variance. Statistical  
287 differences among conditions were calculated using unpaired two-tailed *t* test.

288

### 289 **Isotope labeling and metabolite extraction**

290 To track the uptake and incorporation of <sup>13</sup>C and <sup>15</sup>N isotopes, *S. pistillata* fragments, symbiotic and  
291 aposymbiotic *E. diaphana* polyps, and *C. andromeda* at the medusa stage were incubated for 48 hours with  
292 either filtered seawater, filtered seawater with 10 mM <sup>13</sup>C<sub>6</sub>-glucose, filtered seawater with 250 μM <sup>15</sup>N-  
293 ammonium, or filtered seawater and 10 mM <sup>13</sup>C<sub>6</sub>-glucose and 250 μM <sup>15</sup>N-ammonium. After 48-hours of  
294 incubation, the animal tissues were homogenized following the same procedure mentioned above. The  
295 homogenates were centrifuged at 10,000g for 5 minutes at 4°C to remove the symbionts. Animal tissue  
296 lysates in the supernatants were snap frozen using liquid nitrogen. Animal metabolites were then extracted  
297 as previously described (Matthews et al., 2017). Briefly, animal tissue homogenates were further lysed in  
298 5 ml milli-Q water and lyophilized using a freeze dryer (Labconco). The lyophilisates were resuspended in  
299 1 ml pre-chilled (-20 °C) 100% methanol, sonicated for 30 minutes at 4 °C in an ultrasonication bath  
300 (Branson), and centrifuged at 3,000g for 30 minutes at 4 °C. The supernatants were collected and stored in  
301 -80 °C. The pellets were resuspended in 1 ml 50% methanol (-20 °C) and centrifuged at 3,000g for 30  
302 minutes at 4 °C. The supernatants were then combined with those collected from the previous step. The  
303 total extracts were then centrifuged at 16,000g for 15 minutes at 4 °C to remove any potential particulates.  
304 The supernatants were dried using a speed vacuum concentrator (Labconco) and stored at -80 °C until  
305 further processing.

306

### 307 **Ultra-high-performance liquid chromatography-high resolution mass spectrometry**

308 Amino acid standard solutions were prepared by diluting Amino Acid Standard H (Thermo Fisher  
309 Scientific) to the concentrations of 25 μM for all amino acids except *L*-cystine (12.5 μM), followed by a  
310 10-fold dilution with 25 % aqueous methanol. Standard solutions for 3-phosphohydroxypyruvate (Sigma-  
311 Aldrich) and O-phospho-*L*-serine (Sigma-Aldrich) were individually prepared at a concentration of 2.5 μM

312 in 25 % aqueous methanol. The solutions for host metabolites were prepared with 200  $\mu$ L of 25 % aqueous  
313 methanol and filtered with a 0.2  $\mu$ m filter before the UHPLC-HR-MS analysis.

314 Detections of the amino acids and intermediates (3-phosphohydroxypyruvate, and O-phospho-*L*-serine)  
315 were performed on a Dionex Ultimate 3000 UHPLC system coupled with a Q Exactive Plus mass  
316 spectrometer (Thermo Fisher Scientific) with a heated-electrospray ionization source. Chromatographic  
317 separation of amino acids and intermediates was carried out on an ACQUITY UPLC<sup>®</sup> BEH Amide column  
318 (130Å, 1.7  $\mu$ m, 2.1 mm  $\times$  100 mm, Waters) maintained at 35 °C. The mobile phases A (water/formic acid,  
319 100/0.1, v/v) and B (acetonitrile/formic acid, 100/0.1, v/v) were employed for eluting amino acids at a flow  
320 rate of 0.25 mL/min and with the gradient program: 0–8 min, 95 % B to 25 % B; 8–11 min, 25 % B; 11–  
321 12 min, 25 % B to 95 % B; 12–15 min, 95 % B. In addition, intermediates were eluted with the gradient  
322 program: 0–5 min, 100 % B to 25 % B; 5–8 min, 25 % B; 8–9 min, 25 % B to 100 % B; 9–12 min, 100 %  
323 B. The injection volume was 2  $\mu$ L. Amino acids were detected using a mass spectrometer operated in  
324 positive mode with a spray voltage of 3.0 kV, sheath gas flow rate of 35 arbitrary units, auxiliary gas flow  
325 rate of 10 arbitrary units, spray capillary temperature of 300 °C, auxiliary gas heater temperature of 325 °C,  
326 AGC target of 3e6, and resolution of 280,000. In addition, intermediates were detected using a mass  
327 spectrometer operated in negative mode with a spray voltage of 2.5 kV, sheath gas flow rate of 40 arbitrary  
328 units, auxiliary gas flow rate of 20 arbitrary units, spray capillary temperature of 325 °C, and auxiliary gas  
329 heater temperature of 350 °C. In this work, Xcalibur software was used for the MS data acquisition and  
330 analysis. Amino acids and intermediates from animal tissues were identified and assigned based on their  
331 accurate mass and matching with the corresponding standards. The normalized peak areas of metabolites  
332 with that in the natural form were used for their quantitative comparison.

333

### 334 **<sup>13</sup>C incorporation**

335 We extracted the percentage of <sup>13</sup>C for each selected metabolite from the GS/GOGAT-mediated amino acid  
336 synthesis pathway and then determined its flux for each sample from the appropriate treatments based on a  
337 generalized linear regression model using *glm* function implemented in the R base package. The change of

338 incorporation rates was calculated by averaging the slopes estimated from samples in the same treatment.  
339 We then conducted pairwise comparisons using a Wilcoxon rank-sum exact test with Bonferroni correction  
340 for  $p$ -value adjustment.

341

## 342 **References**

- 343 Baghdasarian, G. and Muscatine, L. (2000). Preferential expulsion of dividing algal cells as a mechanism  
344 for regulating algal-cnidarian symbiosis. *Biol Bull* 199, 278-286.
- 345 Baker, D.M., Freeman, C.J., Wong, J.C.Y., Fogel, M.L., and Knowlton, N. (2018). Climate change  
346 promotes parasitism in a coral symbiosis. *ISME J* 12, 921-930.
- 347 Bull, J.J. and Rice, W.R. (1991). Distinguishing mechanisms for the evolution of co-operation. *J Theor*  
348 *Biol* 149, 63-74.
- 349 Colley, N.J. and Trench, R.K. (1983). Selectivity in phagocytosis and persistence of symbiotic algae in  
350 the scyphistoma stage of the jellyfish *Cassiopeia xamachana*. *Proc R Soc Lond B Biol Sci* 219, 61-82.
- 351 Cui, G., Liew, Y.J., Konciute, M.K., Zhan, Y., Hung, S.H., Thistle, J., Gastoldi, L., Schmidt-Roach, S.,  
352 Dekker, J., and Aranda, M. (2022). Nutritional control regulates symbiont proliferation and life history in  
353 coral-dinoflagellate symbiosis. *BMC Biol* 20, 103.
- 354 Cui, G., Liew, Y.J., Li, Y., Kharbatia, N., Zahran, N.I., Emwas, A.H., Eguiluz, V.M., and Aranda, M.  
355 (2019). Host-dependent nitrogen recycling as a mechanism of symbiont control in *Aiptasia*. *PLoS Genet*  
356 15, e1008189.
- 357 Davy, S.K., Allemand, D., and Weis, V.M. (2012). Cell biology of cnidarian-dinoflagellate symbiosis.  
358 *Microbiol Mol Biol Rev* 76, 229-261.
- 359 Dimond, J.L., Pineda, R.R., Ramos-Ascherl, Z., and Bingham, B.L. (2013). Relationships between host  
360 and symbiont cell cycles in sea anemones and their symbiotic dinoflagellates. *Biol Bull* 225, 102-112.
- 361 Douglas, A.E. (2009). The microbial dimension in insect nutritional ecology. *Funct Ecol* 23, 38-47.
- 362 Falkowski, P.G., Dubinsky, Z., Muscatine, L., and McCloskey, L. (1993). Population control in symbiotic  
363 corals. *BioScience* 43, 606-611.

364 Furla, P., Allemand, D., Shick, J.M., Ferrier-Pages, C., Richier, S., Plantivaux, A., Merle, P.L., and  
365 Tambutte, S. (2005). The symbiotic anthozoan: a physiological chimera between alga and animal. *Integr*  
366 *Comp Biol* 45, 595-604.

367 Hoffmeister, M., and Martin, W. (2003). Interspecific evolution: microbial symbiosis, endosymbiosis and  
368 gene transfer. *Environ Microbiol* 5, 641-649.

369 LaJeunesse, T.C., Parkinson, J.E., Gabrielson, P.W., Jeong, H.J., Reimer, J.D., Voolstra, C.R., and  
370 Santos, S.R. (2018). Systematic revision of Symbiodiniaceae highlights the antiquity and diversity of  
371 coral endosymbionts. *Curr Biol* 28, 2570-2580.

372 Mao, M., Yang, X., and Bennett, G.M. (2018). Evolution of host support for two ancient bacterial  
373 symbionts with differentially degraded genomes in a leafhopper host. *Proc Natl Acad Sci U S A* 115,  
374 E11691-E11700.

375 Matthews, J.L., Crowder, C.M., Oakley, C.A., Lutz, A., Roessner, U., Meyer, E., Grossman, A.R., Weis,  
376 V.M., and Davy, S.K. (2017). Optimal nutrient exchange and immune responses operate in partner  
377 specificity in the cnidarian-dinoflagellate symbiosis. *Proc Natl Acad Sci U S A* 114, 13194-13199.

378 Melo Clavijo, J., Donath, A., Serodio, J., and Christa, G. (2018). Polymorphic adaptations in metazoans  
379 to establish and maintain photosymbioses. *Biol Rev Camb Philos Soc* 93, 2006-2020.

380 Nowack, E.C., and Melkonian, M. (2010). Endosymbiotic associations within protists. *Philos Trans R Soc*  
381 *Lond B Biol Sci* 365, 699-712.

382 Park, E., Hwang, D.S., Lee, J.S., Song, J.I., Seo, T.K., and Won, Y.J. (2012). Estimation of divergence  
383 times in cnidarian evolution based on mitochondrial protein-coding genes and the fossil record. *Mol*  
384 *Phylogenet Evol* 62, 329-345.

385 Rådecker, N., Pogoreutz, C., Gegner, H.M., Cardenas, A., Roth, F., Bougoure, J., Guagliardo, P., Wild,  
386 C., Pernice, M., Raina, J.B., *et al.* (2021). Heat stress destabilizes symbiotic nutrient cycling in corals.  
387 *Proc Natl Acad Sci USA* 118.

388 Sachs, J.L., Russell, J.E., Lii, Y.E., Black, K.C., Lopez, G., and Patil, A.S. (2010). Host control over  
389 infection and proliferation of a cheater symbiont. *J Evol Biol* 23, 1919-1927.



- 390 Smith, G.J., and Muscatine, L. (1999). Cell cycle of symbiotic dinoflagellates: variation in G1 phase-  
391 duration with anemone nutritional status and macronutrient supply in the *Aiptasia pulchella*-  
392 *Symbiodinium pulchrorum* symbiosis. *Mar Biol* 134, 405-418.
- 393 Stat, M., Carter, D., and Hoegh-Guldberg, O. (2006). The evolutionary history of *Symbiodinium* and  
394 scleractinian hosts—Symbiosis, diversity, and the effect of climate change. *Perspect Plant Ecol Evol* 8,  
395 23-43.
- 396 Stat, M., Morris, E., and Gates, R.D. (2008). Functional diversity in coral-dinoflagellate symbiosis. *Proc*  
397 *Natl Acad Sci U S A* 105, 9256-9261.
- 398 Thies, A.B., Quijada-Rodriguez, A.R., Zhouyao, H., Weihrauch, D., and Tresguerres, M. (2022). A  
399 Rhesus channel in the coral symbiosome membrane suggests a novel mechanism to regulate NH<sub>3</sub> and CO<sub>2</sub>  
400 delivery to algal symbionts. *Sci Adv* 8, eabm0303.
- 401 Tivey, T.R., Parkinson, J.E., and Weis, V.M. (2020). Host and symbiont cell cycle coordination is  
402 mediated by symbiotic state, nutrition, and partner identity in a model cnidarian-dinoflagellate symbiosis.  
403 *mBio* 11.
- 404 Tremblay, P., Gori, A., Maguer, J.F., Hoogenboom, M., and Ferrier-Pages, C. (2016). Heterotrophy  
405 promotes the re-establishment of photosynthate translocation in a symbiotic coral after heat stress. *Sci*  
406 *Rep* 6, 38112.
- 407 Van Valen, L. (1973). A new evolutionary law. *Evol Theory* 1, 1-30.
- 408 Wang, J., and Douglas, A.E. (1998). Nitrogen recycling or nitrogen conservation in an alga-invertebrate  
409 symbiosis? *J Exp Biol* 201, 2445-2453.
- 410 Wang, X., Zoccola, D., Liew, Y.J., Tambutte, E., Cui, G., Allemand, D., Tambutte, S., and Aranda, M.  
411 (2021). The evolution of calcification in reef-building corals. *Mol Biol Evol*.
- 412 Xiang, T., Lehnert, E., Jinkerson, R.E., Clowez, S., Kim, R.G., DeNofrio, J.C., Pringle, J.R., and  
413 Grossman, A.R. (2020). Symbiont population control by host-symbiont metabolic interaction in  
414 *Symbiodiniaceae*-cnidarian associations. *Nat Commun* 11, 108.

415 **Author contributions**

416 M.A. and G.C. conceived the study. A.M. and G.C. performed the nutrient supplementation experiments  
417 and the algal cell density measurements. G.C. and A.M. performed the isotope-labeling experiments and  
418 extracted the metabolites. J.M. and S.A.-B. performed UHPLC-HR-MS experiments. G.C., J.M., A.M., and  
419 H.Z. analyzed the metabolomic data. S.H.H. raised the jellyfish line. G.C. and M.A. wrote the initial draft  
420 of the manuscript with input from all of the authors. All authors reviewed and edited the manuscript.

421

422 **Acknowledgment**

423 Figure 1 was created by Heno Hwang, scientific illustrator at King Abdullah University of Science and  
424 Technology (KAUST).

425

426 **Competing interests**

427 The authors declare no competing interests.

428

429 **Figure legends**

430

431 **Figure 1 Nutrient-flux-based negative feedback mechanism underlying symbiont population control.**

432 (A) At the aposymbiotic state, animal hosts are limited by the availability of energy-rich carbohydrates.

433 They take in organic carbon from food and release nitrogenous waste to the surrounding environment.

434 (B) At the early stages of symbiosis, the host experiences an increasing provision of energy-rich  
435 photosynthates from the symbionts and gradually starts shifting towards a nitrogen-limited state.

436 (C) At the fully symbiotic state, symbiont-provided glucose increases the ability of the host to assimilate  
437 its own waste nitrogen, which leads to a further reduction in nitrogen availability to the symbionts and  
438 results in a further decrease of symbiont proliferation rates that eventually reaches a balance where the  
439 symbiont population is stable.

440

441 **Figure 2 Symbiont cell density changes induced by the availability of glucose and ammonium.**

442 Symbiont cell densities were calculated by normalizing total symbiont numbers to host protein content.

443 Bars represent the standard error of the mean. Greek letters indicate statistical differences with a  
444 significance cut-off at  $p = 0.05$ .

445

446 **Figure 3 Identification of isotope-labeled metabolites from *Aiptasia* fed with  $^{13}\text{C}_6$ -glucose and  $^{15}\text{N}$ -  
447 ammonium using UHPLC-HR-MS.**

448 (A) Extracted ion chromatograms (EIC, Left) and the isotopic distributions (Right) of glutamine from *E.*  
449 *diaphana* incubated with  $^{13}\text{C}_6$ -glucose and  $^{15}\text{N}$ -ammonium (Upper) and the corresponding glutamine  
450 standard (Down). The inset corresponds to a zoom of the area in which different isotopologue compositions  
451 of glutamine (dashed box) were identified using HR-MS. The gray ball and square indicate  $^{12}\text{C}$  atom and  
452  $^{14}\text{N}$  atom, respectively; the red ball indicates  $^{13}\text{C}$  atoms, the blue square indicates  $^{15}\text{N}$ , and the number of  
453 carbon and nitrogen atoms are inserted in the corresponding shapes.

454 (B) Metabolic footprinting of stable isotopes in the three selected cnidarian species. The proposed  $^{13}\text{C}$  and  
455  $^{15}\text{N}$  isotope labelings are indicated as red dots or written in blue color in the structural formulas. Heatmap  
456 color indicates the relative abundance of isotope-labeled metabolites normalized to their natural non-labeled  
457 forms. Sym, symbiotic state; Apo, aposymbiotic state; \*, undetectable metabolite.

458

459 **Figure 4 The incorporation of  $^{13}\text{C}$  across metabolites of GS/GOGAT-mediated amino acid synthesis.**

460 Bars represent the standard error of the mean.

461

462 **Supplemental information**

463

464 **Figure S1.** The combined effects of glucose and ammonium on symbiont cell density changes.

465 **Figure S2.** Effects of glucose and ammonium on symbiont cell density changes in the coral *Acropora*  
466 *hemprichii*.

467 **Figure S3.** Extracted ion chromatograms (EIC) of standards.

468 **Figure S4.** Identification of 3-phosphohydroxypyruvate isolated from symbiotic *S. pistillata*.

469 **Figure S5.** Identification of 3-phosphohydroxypyruvate isolated from symbiotic *C. andromeda*.

470 **Figure S6.** Identification of 3-phosphohydroxypyruvate isolated from symbiotic *E. diaphana*.

471 **Figure S7.** Identification of 3-phosphohydroxypyruvate isolated from aposymbiotic *E. diaphana*.

472 **Figure S8.** Identification of glutamate isolated from symbiotic *S. pistillata*.

473 **Figure S9.** Identification of glutamate isolated from symbiotic *C. andromeda*.

474 **Figure S10.** Identification of glutamate isolated from symbiotic *E. diaphana*.

475 **Figure S11.** Identification of glutamate isolated from aposymbiotic *E. diaphana*.

476 **Figure S12.** Identification of glutamine isolated from symbiotic *S. pistillata*.

477 **Figure S13.** Identification of glutamine isolated from symbiotic *C. andromeda*.

478 **Figure S14.** Identification of glutamine isolated from symbiotic *E. diaphana*.

479 **Figure S15.** Identification of glutamine isolated from aposymbiotic *E. diaphana*.

480 **Figure S16.** Identification of O-phospho-L-serine isolated from symbiotic *E. diaphana*.

481 **Figure S17.** Identification of O-phospho-L-serine isolated from aposymbiotic *E. diaphana*.

482 **Figure S18.** Identification of serine isolated from symbiotic *S. pistillata*.

483 **Figure S19.** Identification of serine isolated from symbiotic *C. andromeda*.

484 **Figure S20.** Identification of serine isolated from symbiotic *E. diaphana*.

485 **Figure S21.** Identification of serine isolated from aposymbiotic *E. diaphana*.

486 **Figure S22.** Identification of glycine isolated from symbiotic *S. pistillata*.

487 **Figure S23.** Identification of glycine isolated from symbiotic *C. andromeda*.

488 **Figure S24.** Identification of glycine isolated from symbiotic *E. diaphana*.

489 **Figure S25.** Identification of glycine isolated from aposymbiotic *E. diaphana*.

490 **Figure S26.** Generalized linear model of  $^{13}\text{C}$  proportion in metabolites across the GS/GOGAT-mediated  
491 amino acid synthesis pathway.

492

493 **Table S1.** Quantitative results of labeled metabolites isolated from symbiotic *S. pistillata*

494 **Table S2.** Quantitative results of labeled metabolites isolated from symbiotic *E. diaphana*

495 **Table S3.** Quantitative results of labeled metabolites isolated from symbiotic *C. andromeda*

496 **Table S4.** Quantitative results of labeled metabolites isolated from aposymbiotic *E. diaphana*

497

498

## Figures

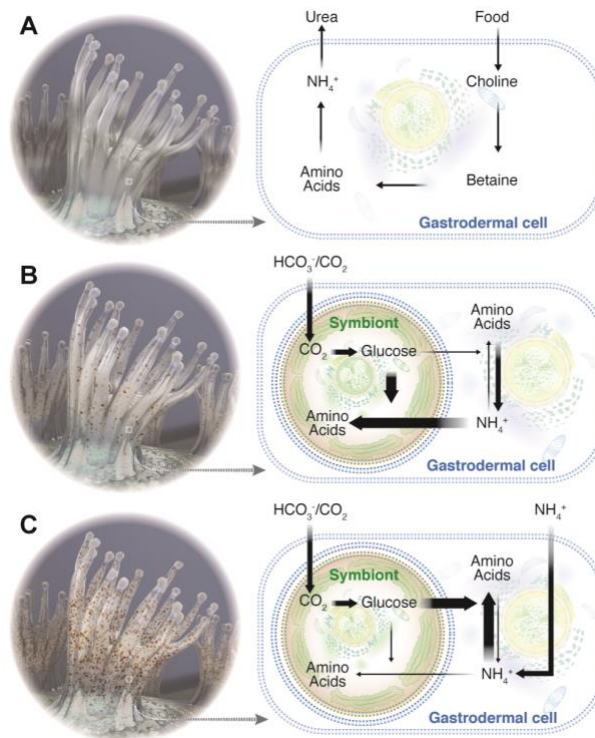

499

500

### Figure 1 Nutrient-flux-based negative feedback mechanism underlying symbiont population control.

501

(A) At the aposymbiotic state, animal hosts are limited by the availability of energy-rich carbohydrates.

502

They take in organic carbon from food and release nitrogenous waste to the surrounding environment.

503

(B) At the early stages of symbiosis, the host experiences an increasing provision of energy-rich

504

photosynthates from the symbionts and gradually starts shifting towards a nitrogen-limited state.

505

(C) At the fully symbiotic state, symbiont-provided glucose increases the ability of the host to assimilate

506

its own waste nitrogen, which leads to a further reduction in nitrogen availability to the symbionts and

507

results in a further decrease of symbiont proliferation rates that eventually reaches a balance where the

508

symbiont population is stable.

509

510

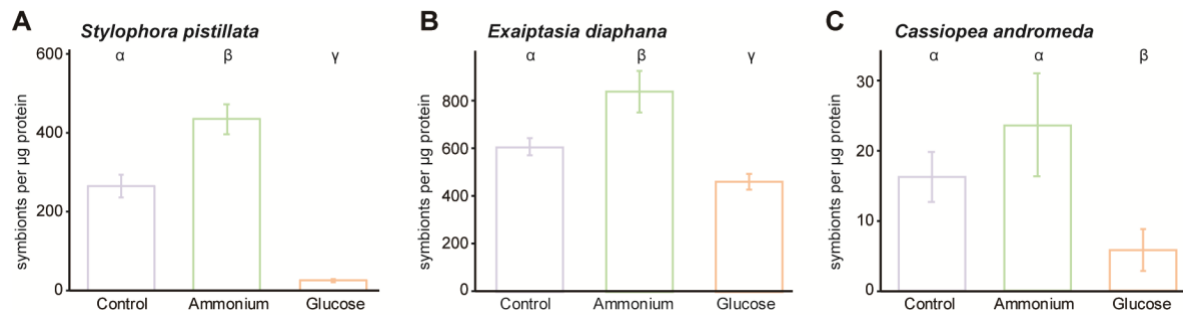

511

512 **Figure 2 Symbiont cell density changes induced by the availability of glucose and ammonium.**

513 Symbiont cell densities were calculated by normalizing total symbiont numbers to host protein content.

514 Bars represent the standard error of the mean. Greek letters indicate statistical differences with a

515 significance cut-off at  $p = 0.05$ .

516



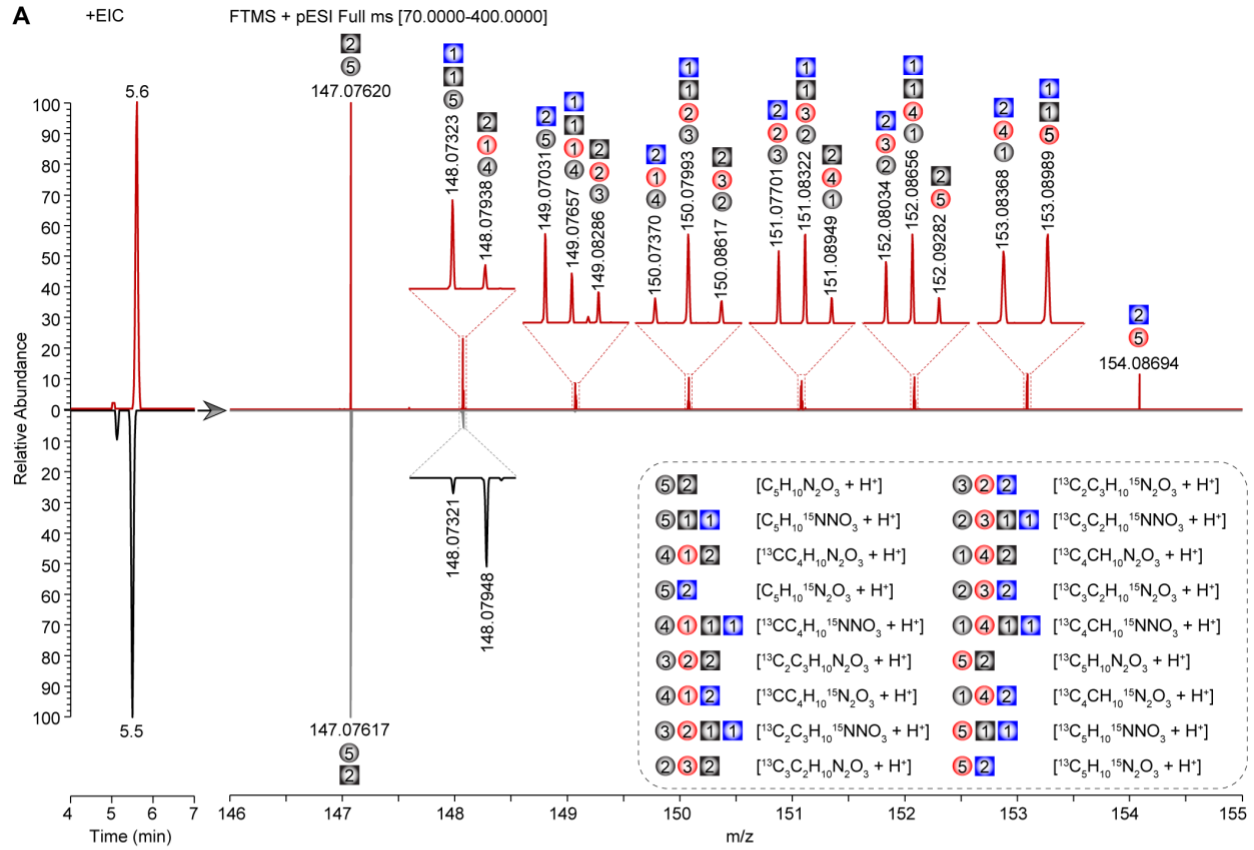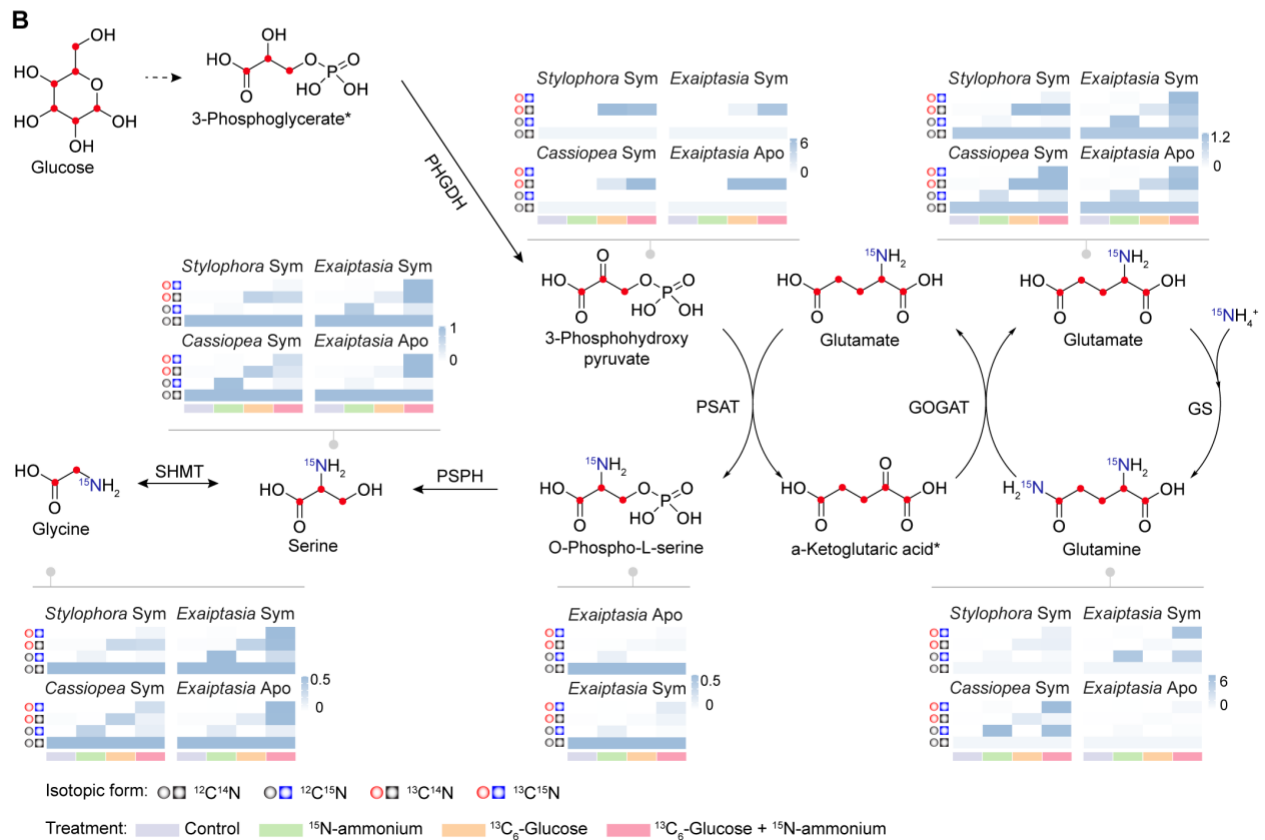

518 **Figure 3 Identification of isotope-labeled metabolites from *Aiptasia* fed with  $^{13}\text{C}_6$ -glucose and  $^{15}\text{N}$ -**  
519 **ammonium using UHPLC-HR-MS.**

520 (A) Extracted ion chromatograms (EIC, Left) and the isotopic distributions (Right) of glutamine from *E.*  
521 *diaphana* incubated with  $^{13}\text{C}_6$ -glucose and  $^{15}\text{N}$ -ammonium (Upper) and the corresponding glutamine  
522 standard (Down). The inset corresponds to a zoom of the area in which different isotopologue compositions  
523 of glutamine (dashed box) were identified using HR-MS. The gray ball and square indicate  $^{12}\text{C}$  atom and  
524  $^{14}\text{N}$  atom, respectively; the red ball indicates  $^{13}\text{C}$  atoms, the blue square indicates  $^{15}\text{N}$ , and the number of  
525 carbon and nitrogen atoms are inserted in the corresponding shapes.

526 (B) Metabolic footprinting of stable isotopes in the three selected cnidarian species. The proposed  $^{13}\text{C}$  and  
527  $^{15}\text{N}$  isotope labelings are indicated as red dots or written in blue color in the structural formulas. Heatmap  
528 color indicates the relative abundance of isotope-labeled metabolites normalized to their natural non-labeled  
529 forms. Sym, symbiotic state; Apo, aposymbiotic state; \*, undetectable metabolite.

530

531

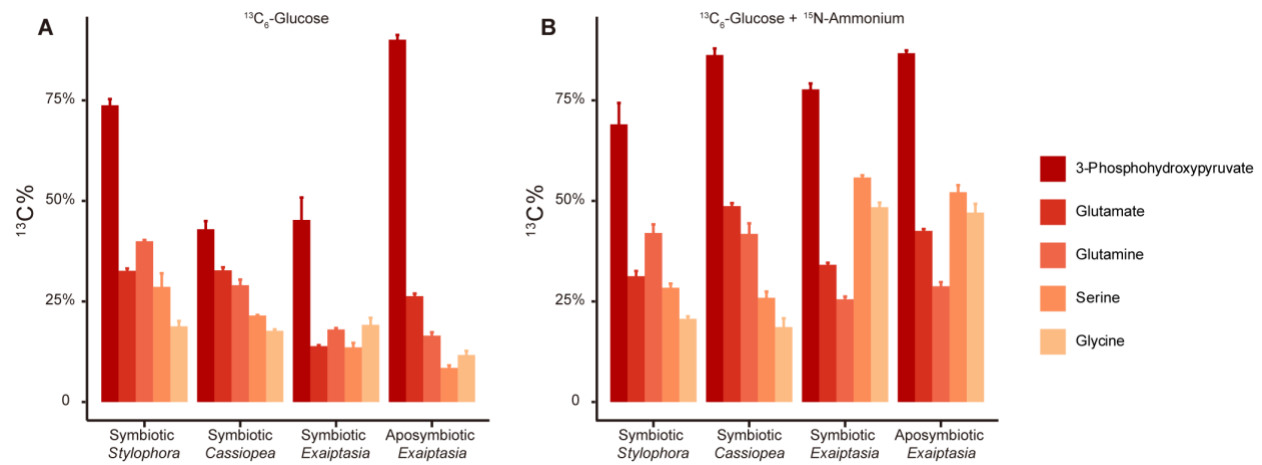

532

533 **Figure 4 The incorporation of 13C across metabolites of GS/GOGAT-mediated amino acid synthesis.**

534 Bars represent the standard error of the mean.

535

536

## Supplemental Figures

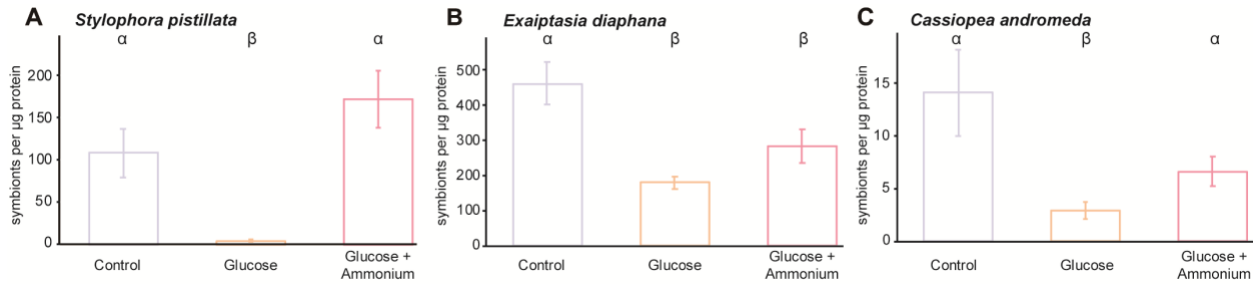

537

538

### Figure S1. The combined effects of glucose and ammonium on symbiont cell density changes.

539

Symbiont cell densities were calculated by normalizing total symbiont numbers to host protein content.

540

Bars represent the mean  $\pm$  SE. Greek letters indicate statistical differences with a significance cut-off at  $p$

541

$= 0.05$ .

542

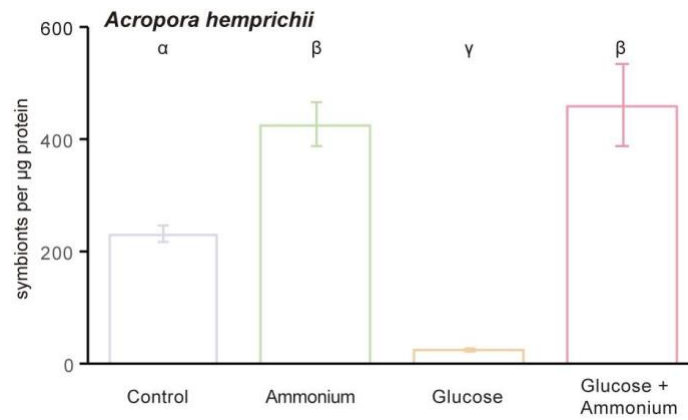

543

544 **Figure S2. Effects of glucose and ammonium on symbiont cell density changes in the coral *Acropora***  
545 ***hemprichii*.**

546 Bars represent the mean  $\pm$  SE. Greek letters indicate statistical differences with a significance cut-off at  $p$   
547 = 0.05.

548

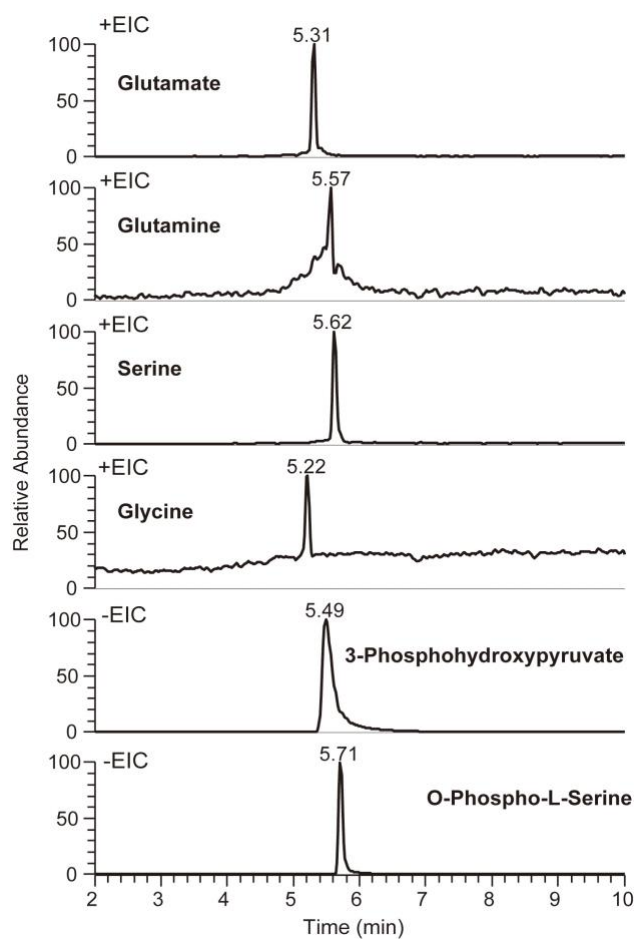

549

550

**Figure S3. Extracted ion chromatograms (EIC) of standards.**

551

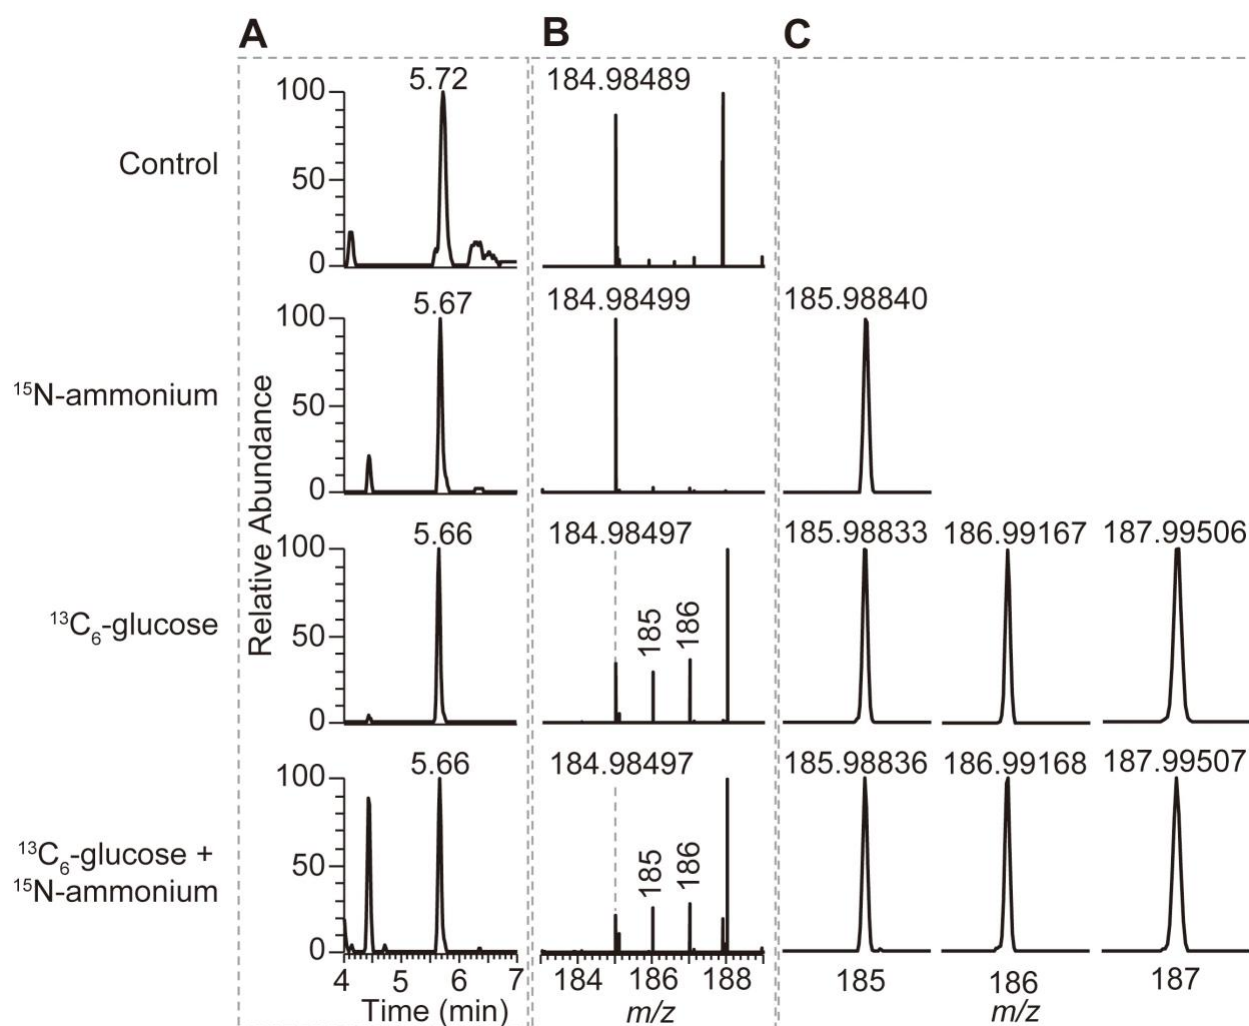

552

553 **Figure S4. Identification of 3-phosphohydroxypyruvate isolated from symbiotic *S. pistillata*.**

554 (A, B) Extracted ion chromatograms (EIC) (A) and the isotopic distributions (B) of 3-  
555 phosphohydroxypyruvate isolated from symbiotic *S. pistillata* at different conditions.

556 (C) The zoom of the area in (B) showing that different isotopologue compositions of 3-  
557 phosphohydroxypyruvate are distinguished by HR-MS.

558

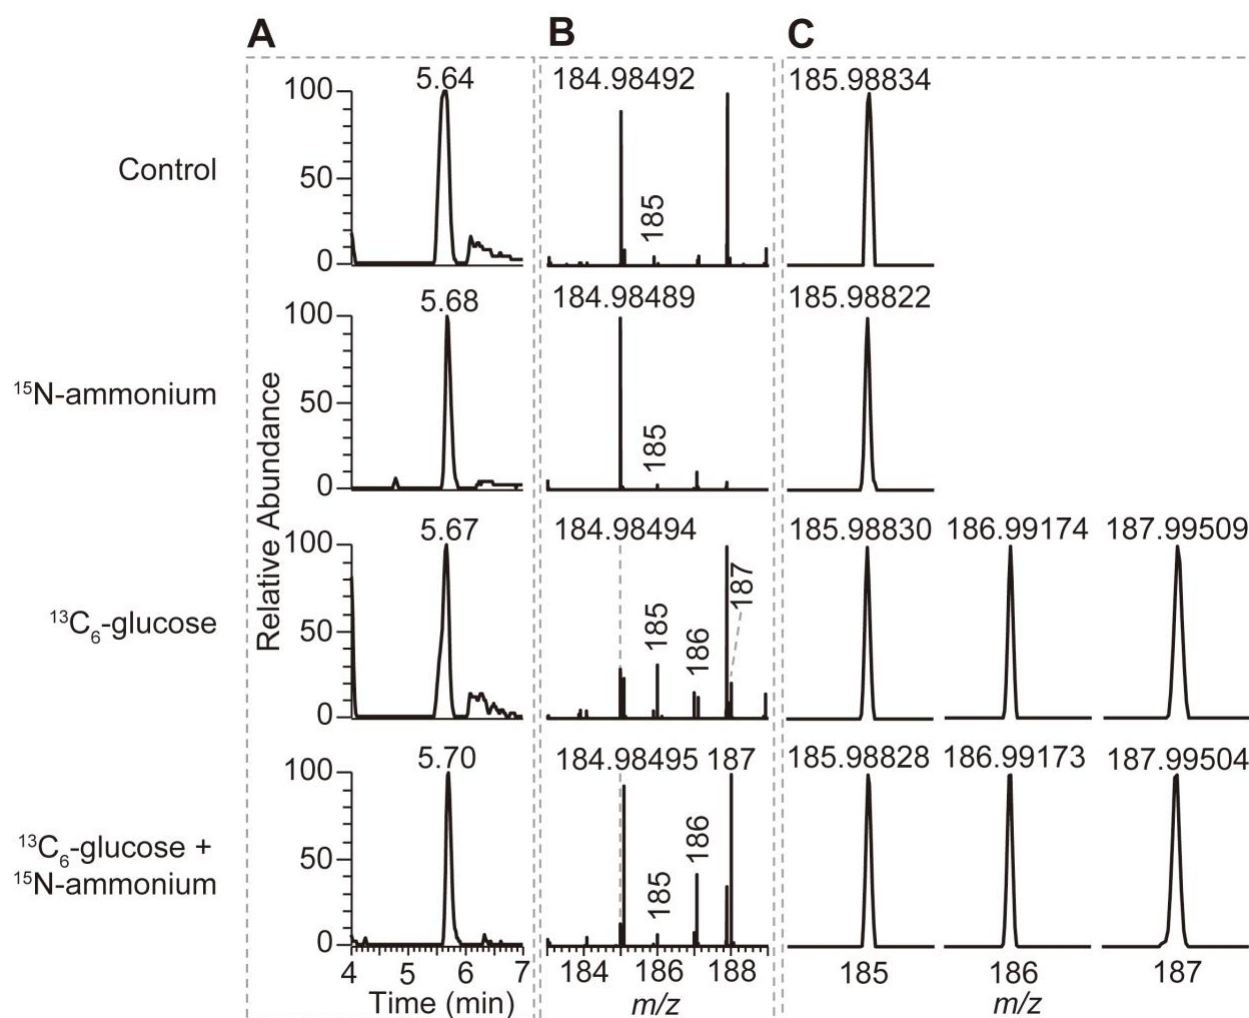

559

560

**Figure S5. Identification of 3-phosphohydroxypyruvate isolated from symbiotic *C. andromeda*.**

561

(A, B) Extracted ion chromatograms (EIC) (A) and the isotopic distributions (B) of 3-

562

phosphohydroxypyruvate isolated from symbiotic *C. andromeda* at different conditions.

563

(C) The zoom of the area in (B) showing that different isotopologue compositions of 3-

564

phosphohydroxypyruvate are distinguished by HR-MS.



565

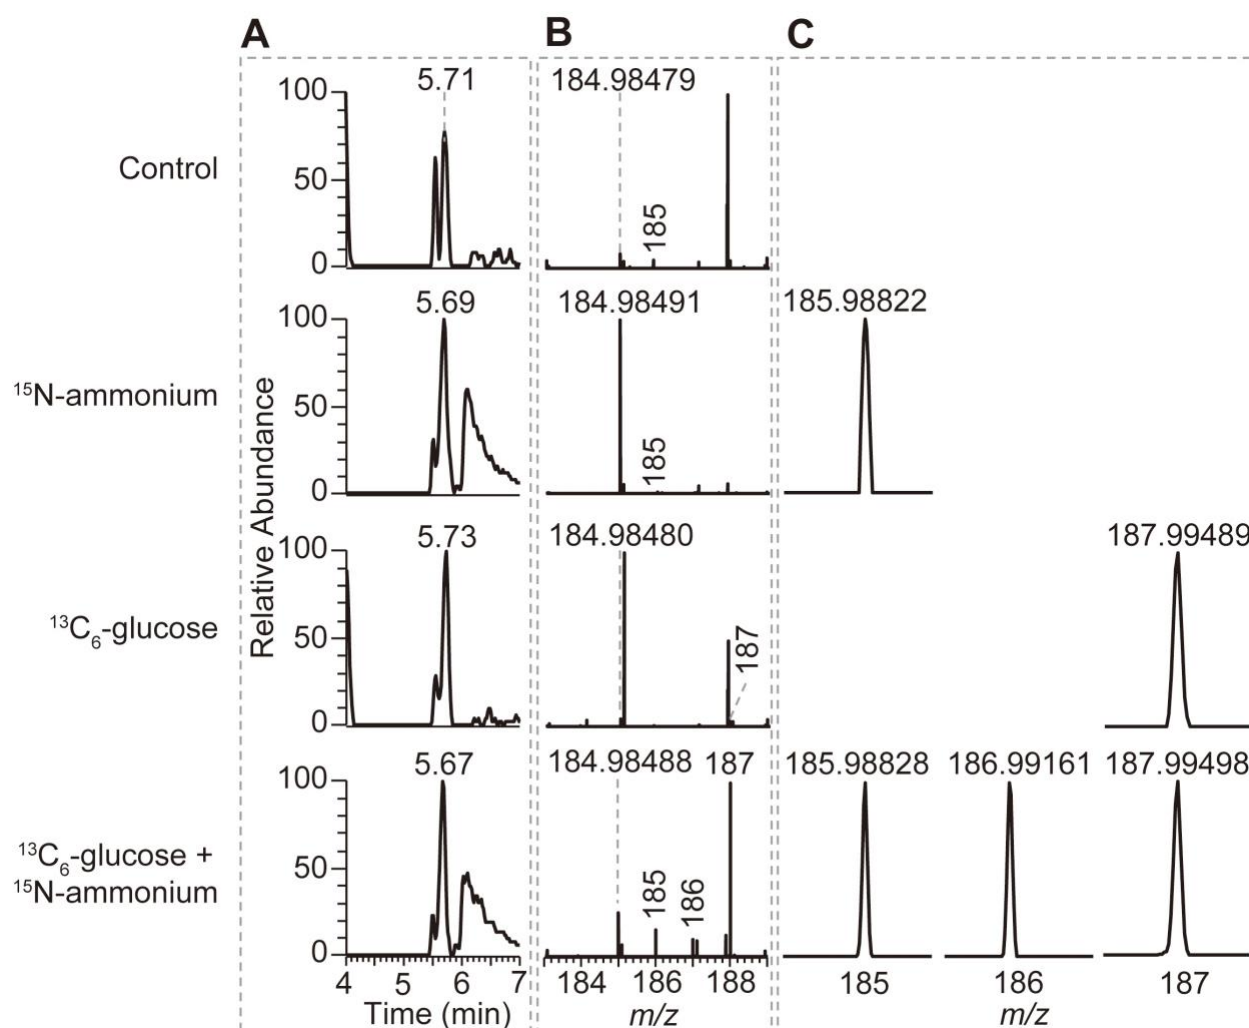

566

567

**Figure S6. Identification of 3-phosphohydroxypyruvate isolated from symbiotic *E. diaphana*.**

568

(A, B) Extracted ion chromatograms (EIC) (A) and the isotopic distributions (B) of 3-phosphohydroxypyruvate isolated from symbiotic *E. diaphana* at different conditions.

569

570

(C) The zoom of the area in (B) showing that different isotopologue compositions of 3-phosphohydroxypyruvate are distinguished by HR-MS.

571

572

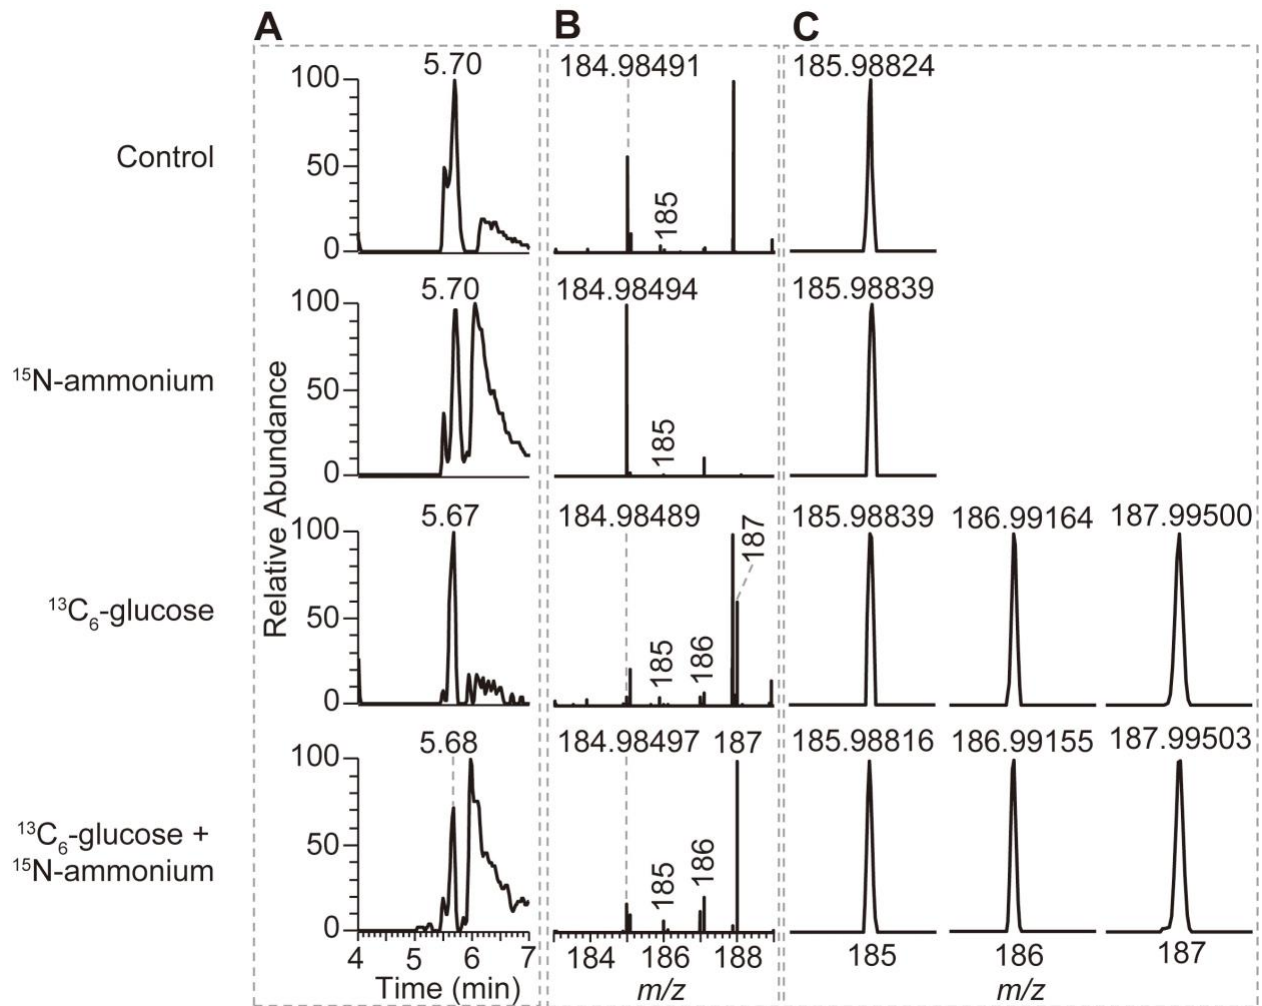

573

574 **Figure S7. Identification of 3-phosphohydroxypyruvate isolated from aposymbiotic *E. diaphana*.**

575 (A, B) Extracted ion chromatograms (EIC) (A) and the isotopic distributions (B) of 3-  
576 phosphohydroxypyruvate isolated from aposymbiotic *E. diaphana* at different conditions.

577 (C) The zoom of the area in (B) showing that different isotopologue compositions of 3-  
578 phosphohydroxypyruvate are distinguished by HR-MS.

579

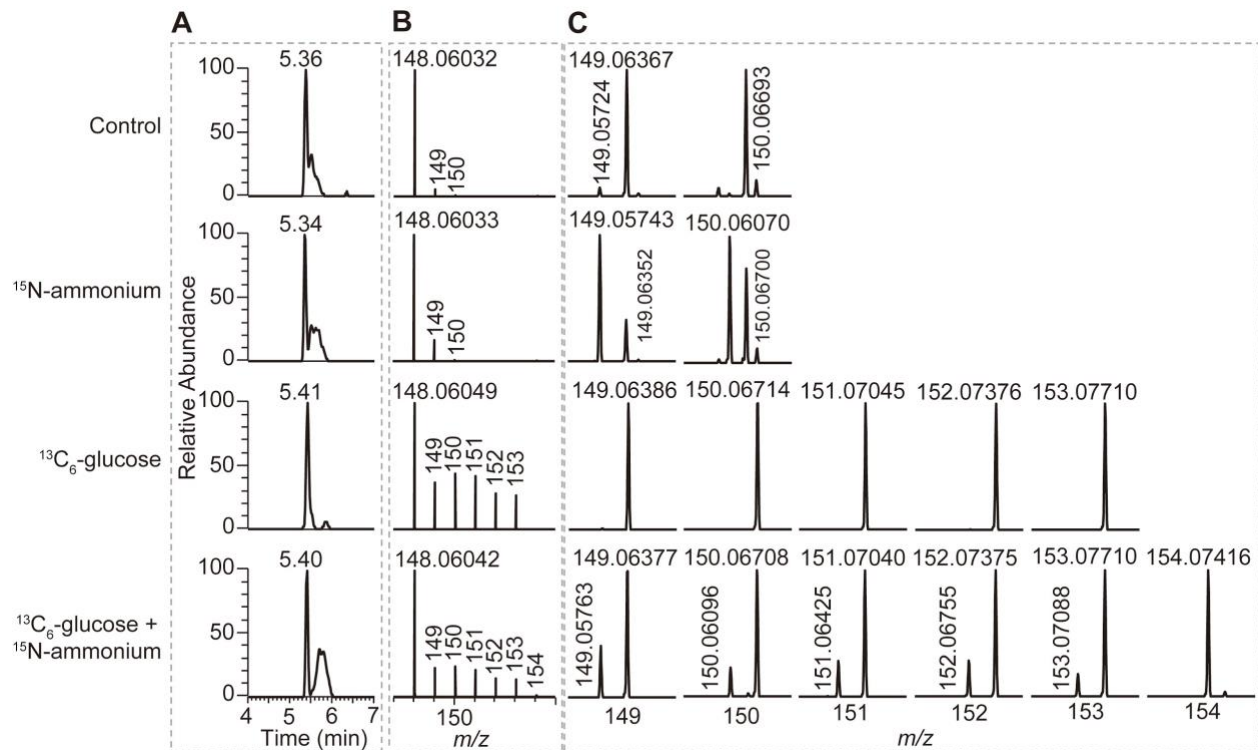

580

581 **Figure S8. Identification of glutamate isolated from symbiotic *S. pistillata*.**

582 (A, B) Extracted ion chromatograms (EIC) (A) and the isotopic distributions (B) of glutamate isolated from  
583 symbiotic *S. pistillata* at different conditions.

584 (C) The zoom of the area in (B) showing that different isotopologue compositions of glutamate are  
585 distinguished by HR-MS.

586

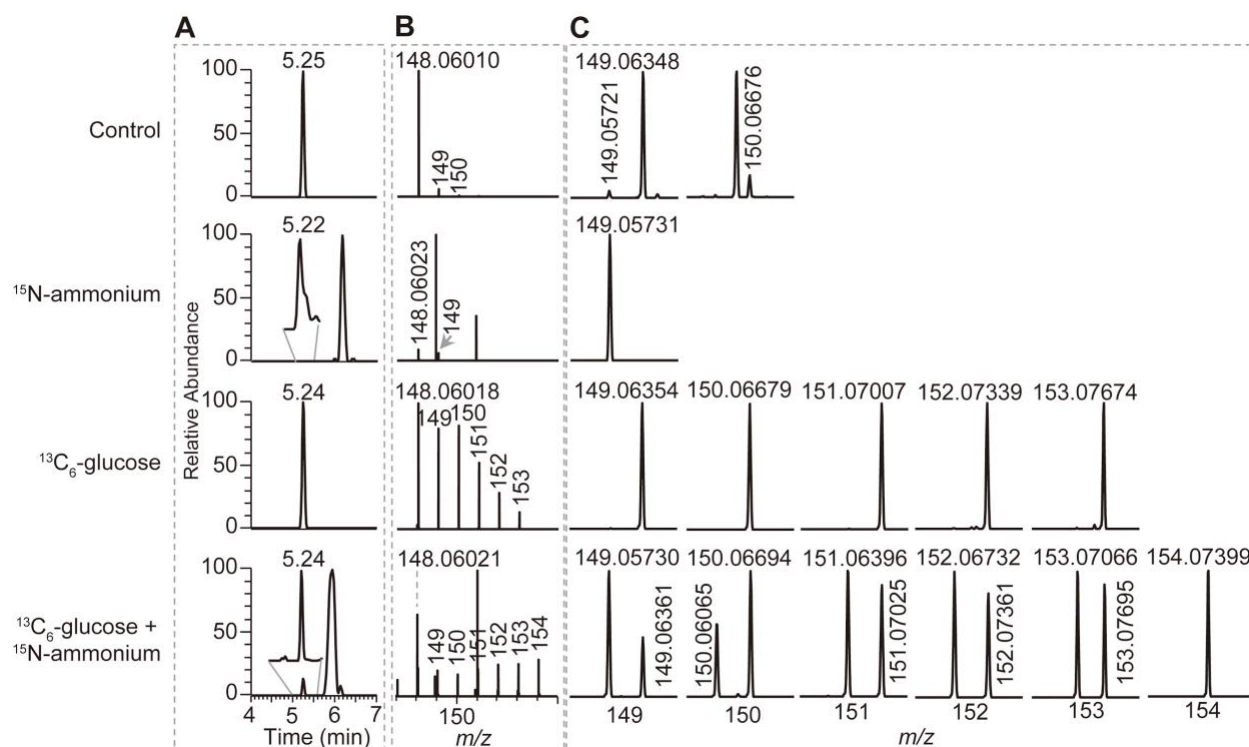

587

588 **Figure S9. Identification of glutamate isolated from symbiotic *C. andromeda*.**

589 (A, B) Extracted ion chromatograms (EIC) (A) and the isotopic distributions (B) of glutamate isolated from  
590 symbiotic *C. andromeda* at different conditions.

591 (C) The zoom of the area in (B) showing that different isotopologue compositions of glutamate are  
592 distinguished by HR-MS.

593

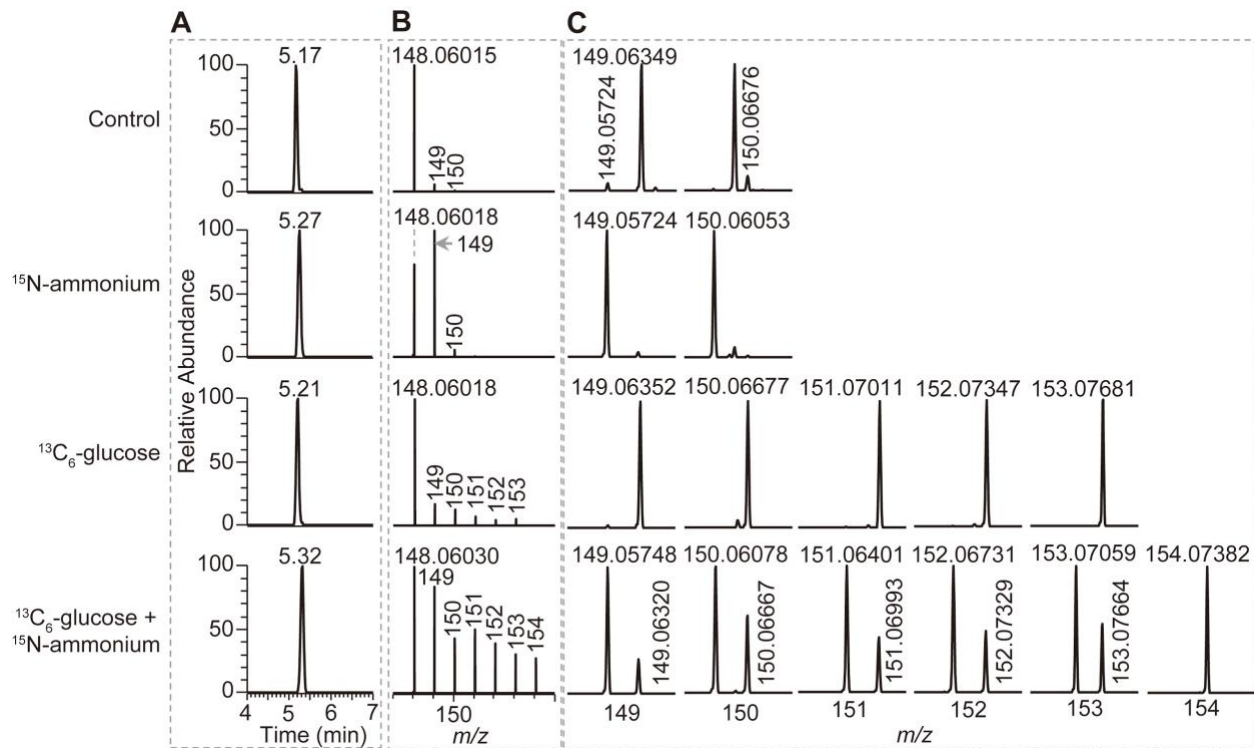

594

595 **Figure S10. Identification of glutamate isolated from symbiotic *E. diaphana*.**

596 (A, B) Extracted ion chromatograms (EIC) (A) and the isotopic distributions (B) of glutamate isolated from  
597 symbiotic *E. diaphana* at different conditions.

598 (C) The zoom of the area in (B) showing that different isotopologue compositions of glutamate are  
599 distinguished by HR-MS.

600

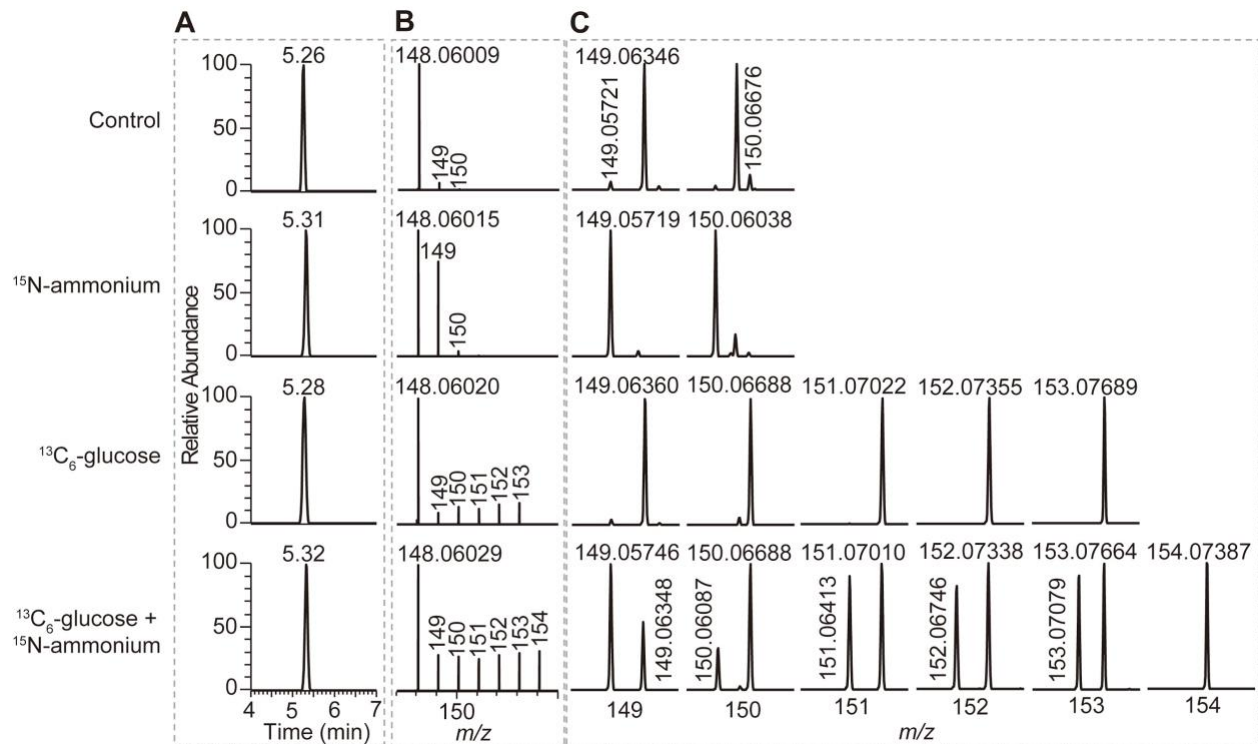

601

602 **Figure S11. Identification of glutamate isolated from aposymbiotic *E. diaphana*.**

603 (A, B) Extracted ion chromatograms (EIC) (A) and the isotopic distributions (B) of glutamate isolated from  
604 aposymbiotic *E. diaphana* at different conditions.

605 (C) The zoom of the area in (B) showing that different isotopologue compositions of glutamate are  
606 distinguished by HR-MS.

607

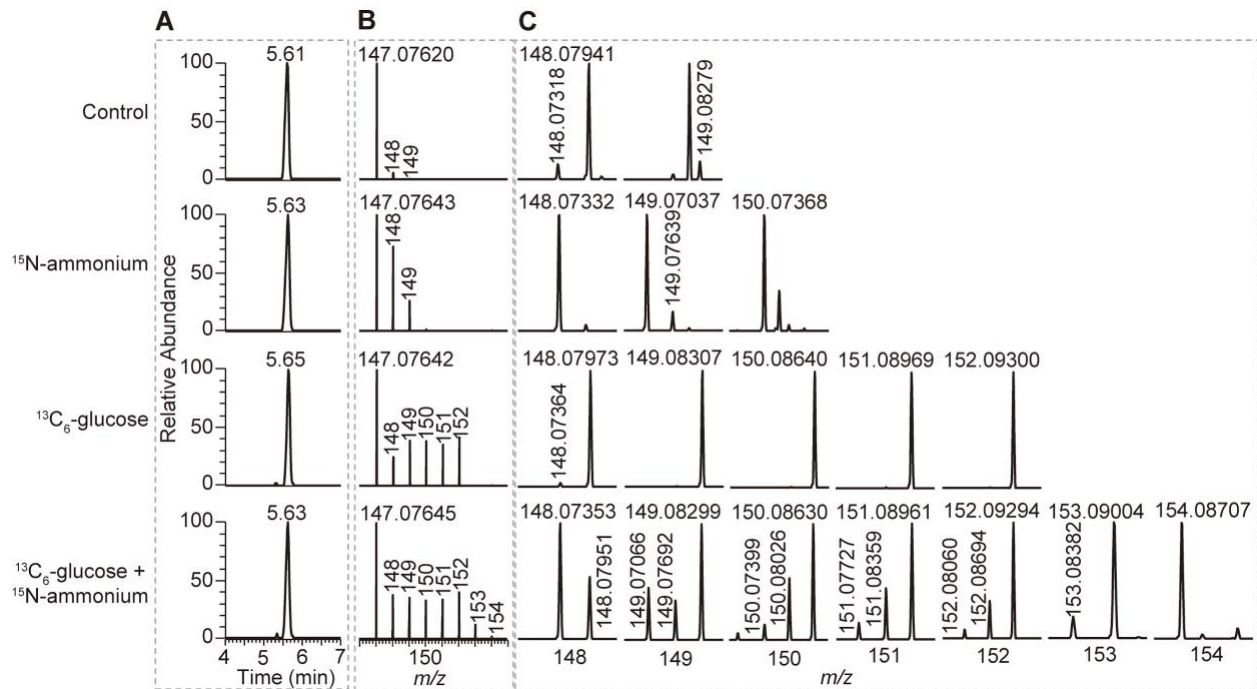

608

609 **Figure S12. Identification of glutamine isolated from symbiotic *S. pistillata*.**

610 (A, B) Extracted ion chromatograms (EIC) (A) and the isotopic distributions (B) of glutamine isolated from  
611 symbiotic *S. pistillata* at different conditions.

612 (C) The zoom of the area in (B) showing that different isotopologue compositions of glutamine are  
613 distinguished by HR-MS.

614

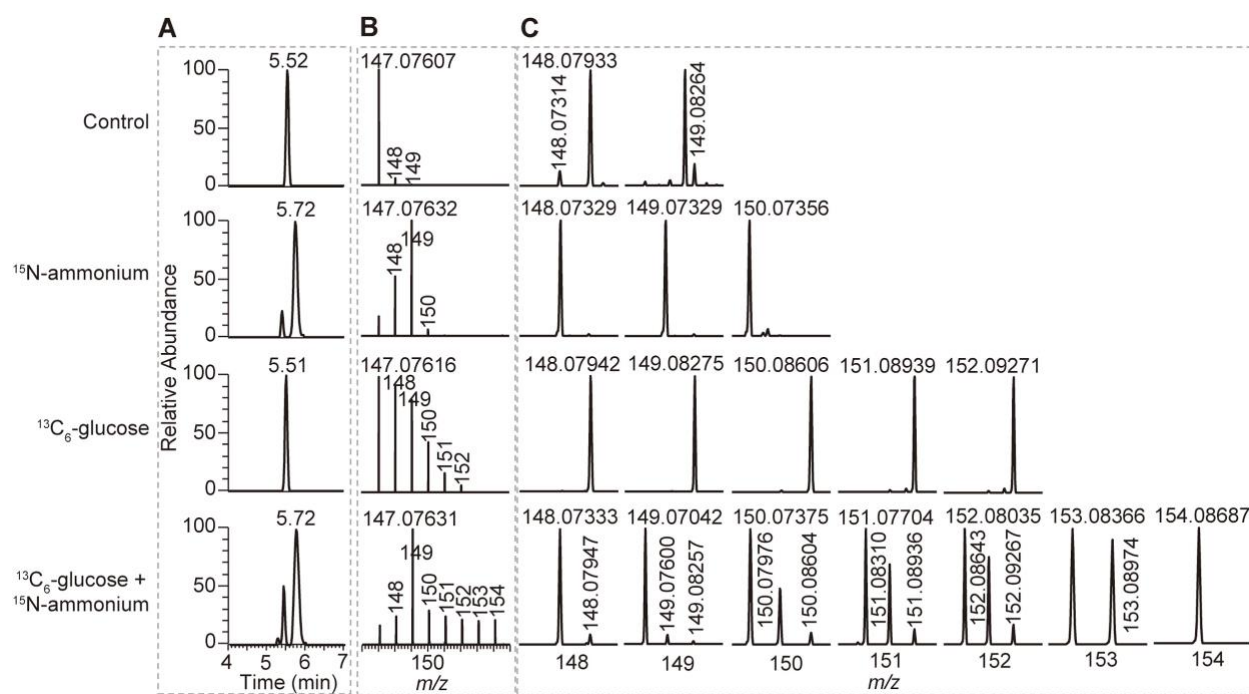

615

616 **Figure S13. Identification of glutamine isolated from symbiotic *C. andromeda*.**

617 (A, B) Extracted ion chromatograms (EIC) (A) and the isotopic distributions (B) of glutamine isolated from  
618 symbiotic *C. andromeda* at different conditions.

619 (C) The zoom of the area in (B) showing that different isotopologue compositions of glutamine are  
620 distinguished by HR-MS.



621

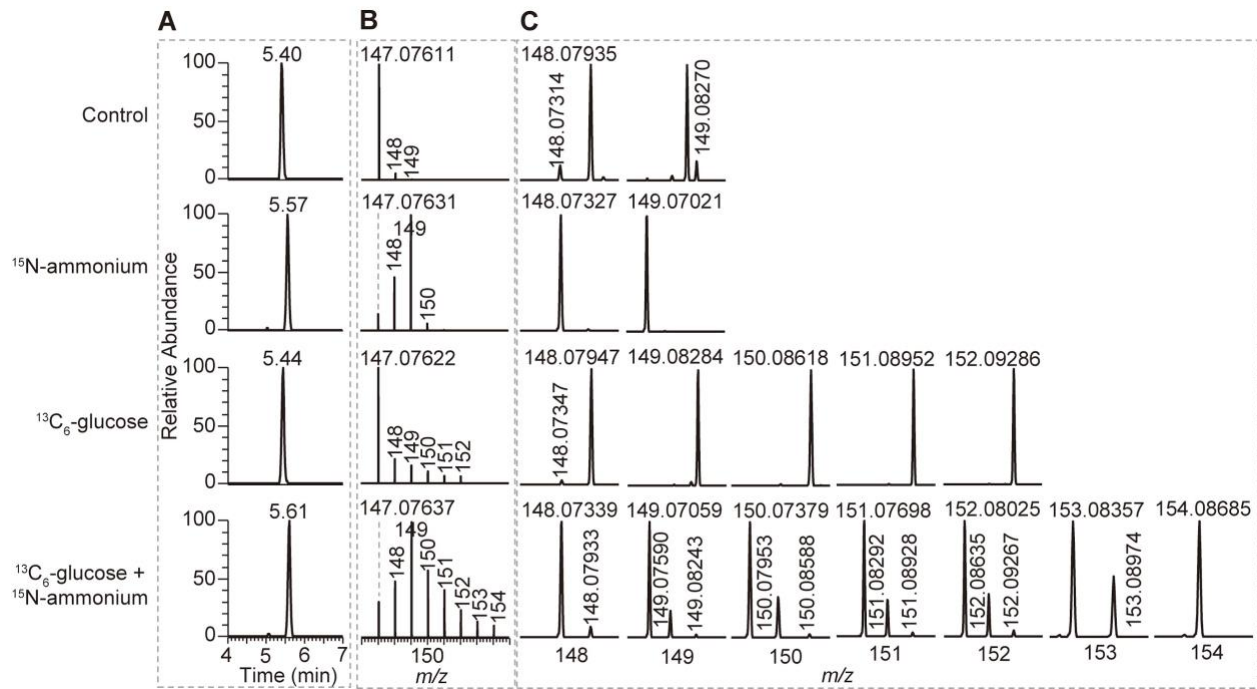

622

623 **Figure S14. Identification of glutamine isolated from symbiotic *E. diaphana*.**

624 (A, B) Extracted ion chromatograms (EIC) (A) and the isotopic distributions (B) of glutamine isolated from  
625 symbiotic *E. diaphana* at different conditions.

626 (C) The zoom of the area in (B) showing that different isotopologue compositions of glutamine are  
627 distinguished by HR-MS.

628

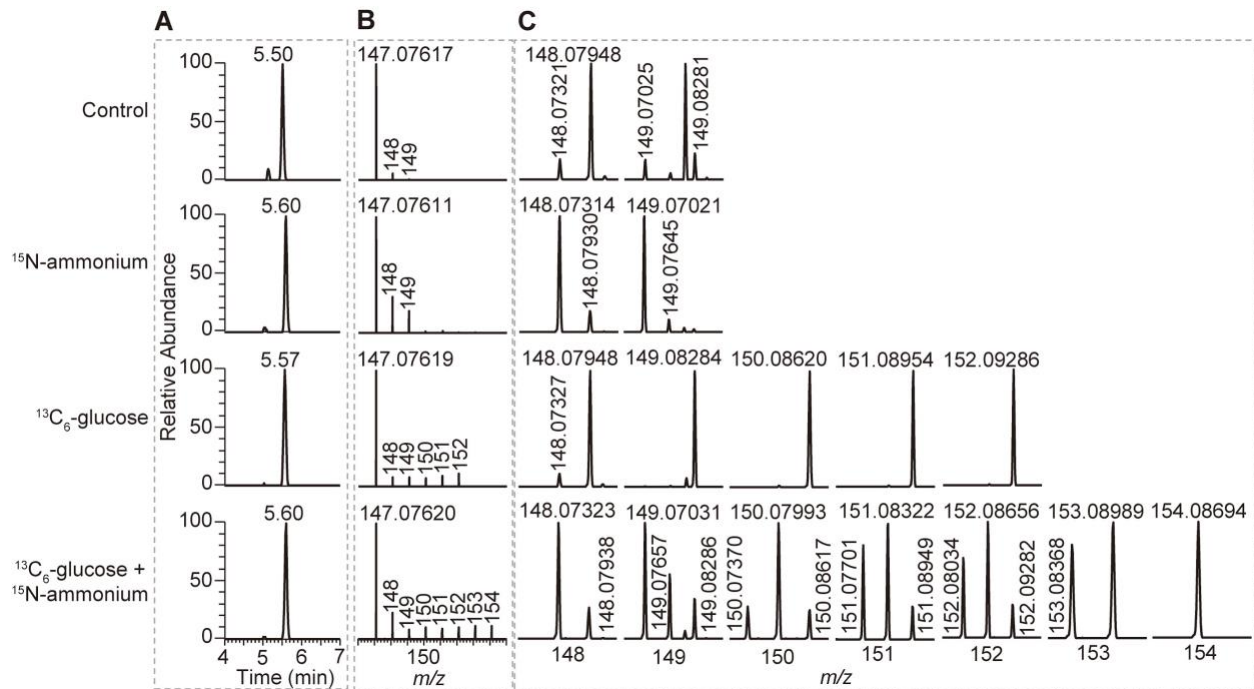

629

630 **Figure S15. Identification of glutamine isolated from aposymbiotic *E. diaphana*.**

631 (A, B) Extracted ion chromatograms (EIC) (A) and the isotopic distributions (B) of glutamine isolated from  
632 aposymbiotic *E. diaphana* at different conditions.

633 (C) The zoom of the area in (B) showing that different isotopologue compositions of glutamine are  
634 distinguished by HR-MS.

635

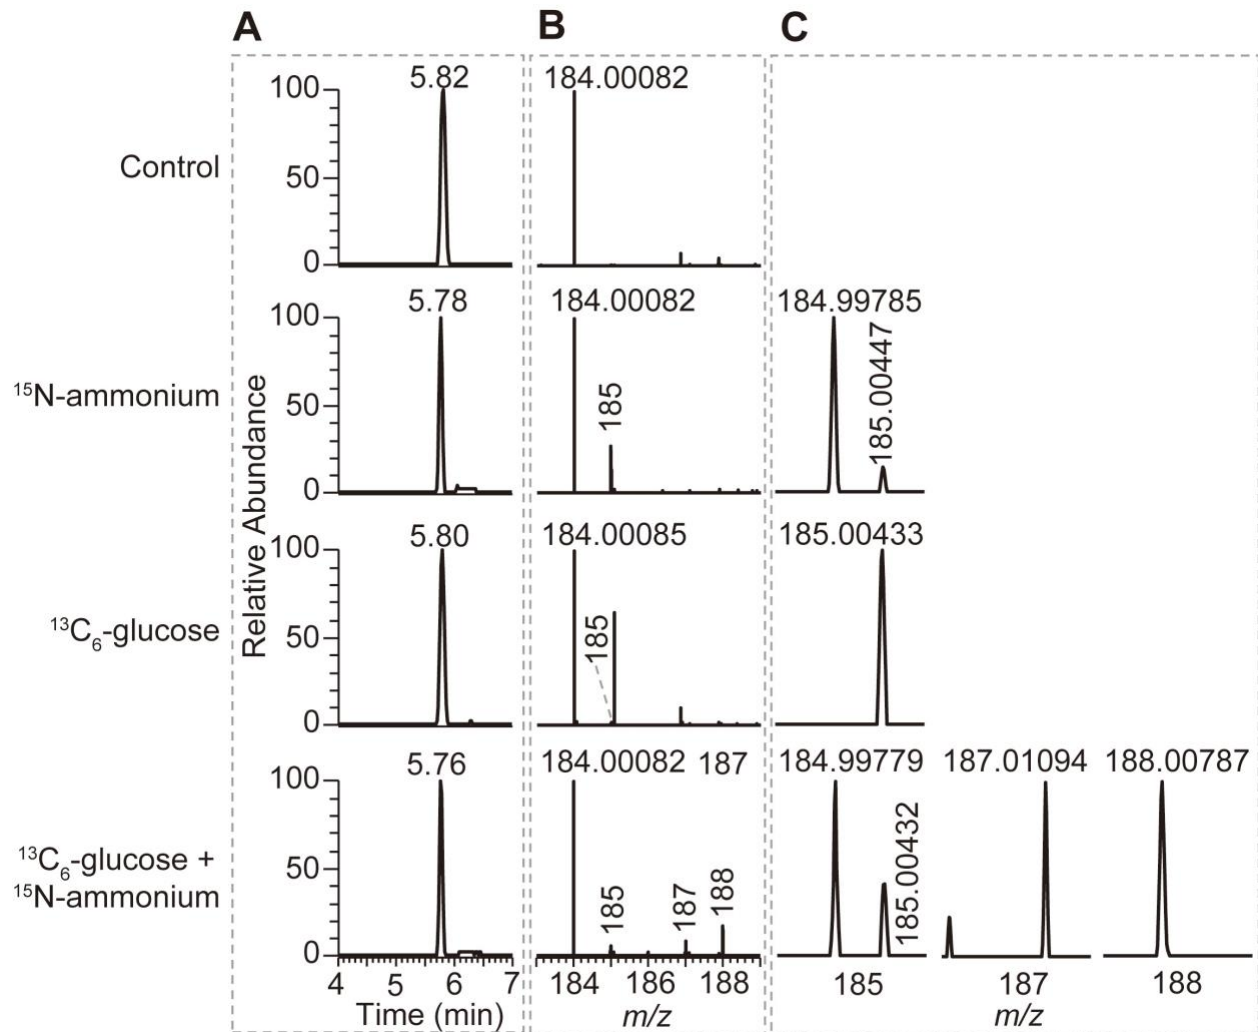

636

637 **Figure S16. Identification of O-phospho-L-serine isolated from symbiotic *E. diaphana*.**

638 (A, B) Extracted ion chromatograms (EIC) (A) and the isotopic distributions (B) of O-phospho-L-serine

639 isolated from symbiotic *E. diaphana* at different conditions.

640 (C) The zoom of the area in (B) showing that different isotopologue compositions of O-phospho-L-serine

641 are distinguished by HR-MS.

642

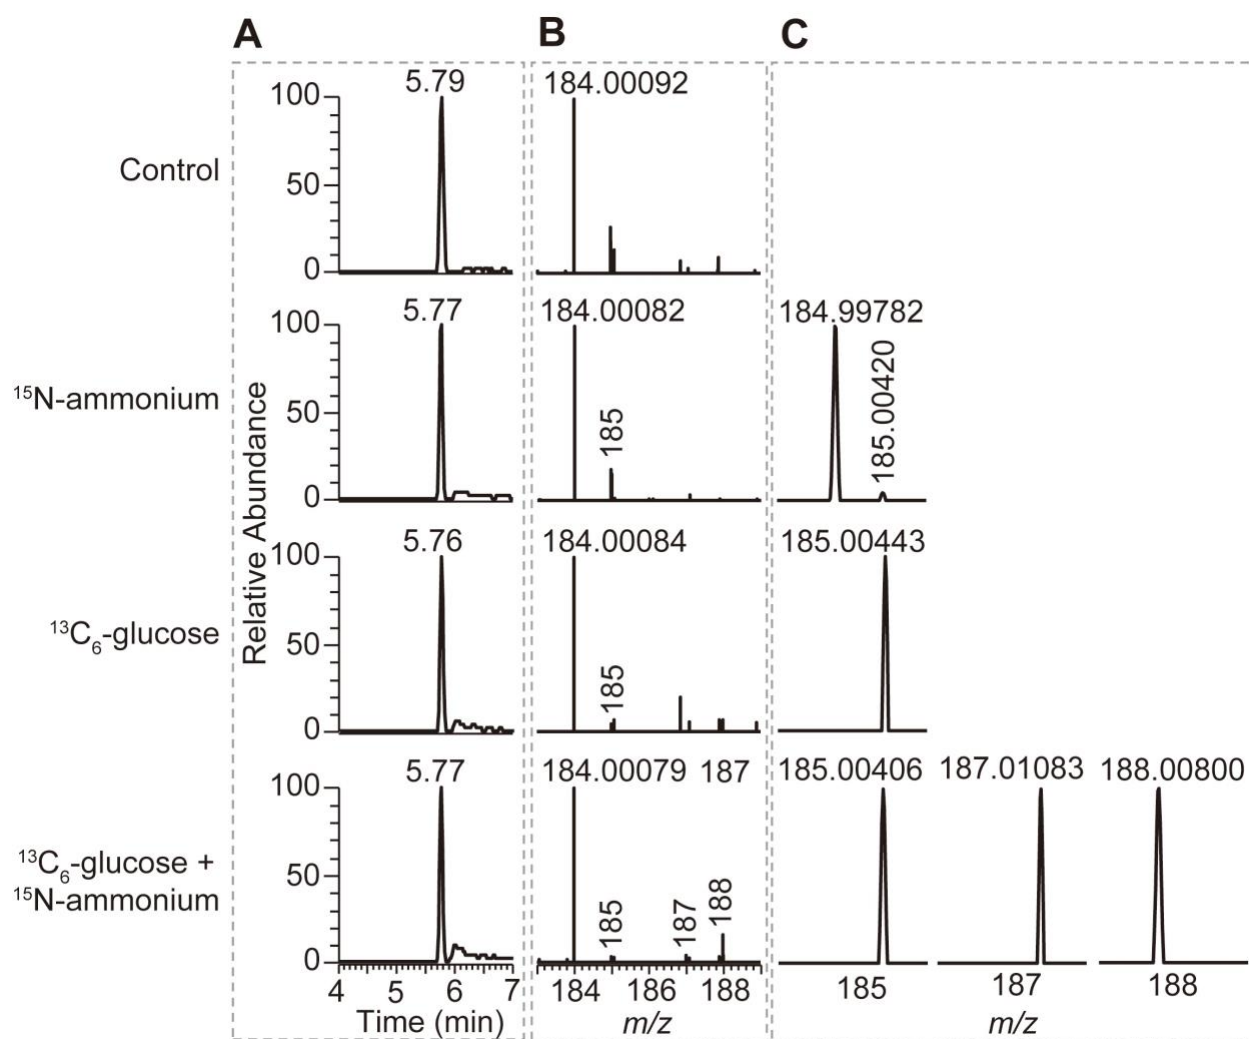

643

644 **Figure S17. Identification of O-phospho-L-serine isolated from aposymbiotic *E. diaphana*.**

645 (A, B) Extracted ion chromatograms (EIC) (A) and the isotopic distributions (B) of O-phospho-L-serine

646 isolated from aposymbiotic *E. diaphana* at different conditions.

647 (C) The zoom of the area in (B) showing that different isotopologue compositions of O-phospho-L-serine

648 are distinguished by HR-MS.

649

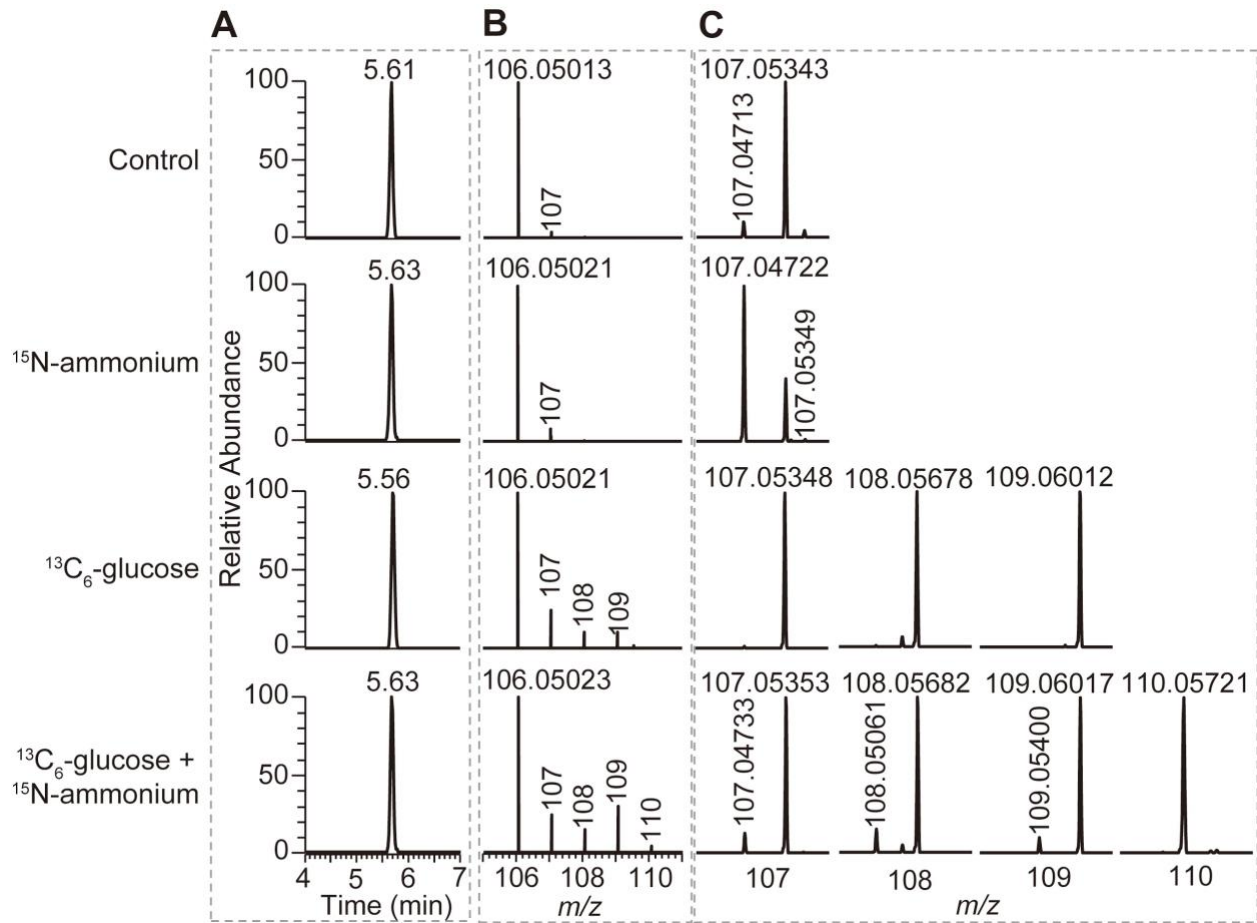

650

651

**Figure S18. Identification of serine isolated from symbiotic *S. pistillata*.**

652

(A, B) Extracted ion chromatograms (EIC) (A) and the isotopic distributions (B) of serine isolated from symbiotic *S. pistillata* at different conditions.

653

654

(C) The zoom of the area in (B) showing that different isotopologue compositions of serine are distinguished by HR-MS.

655

656

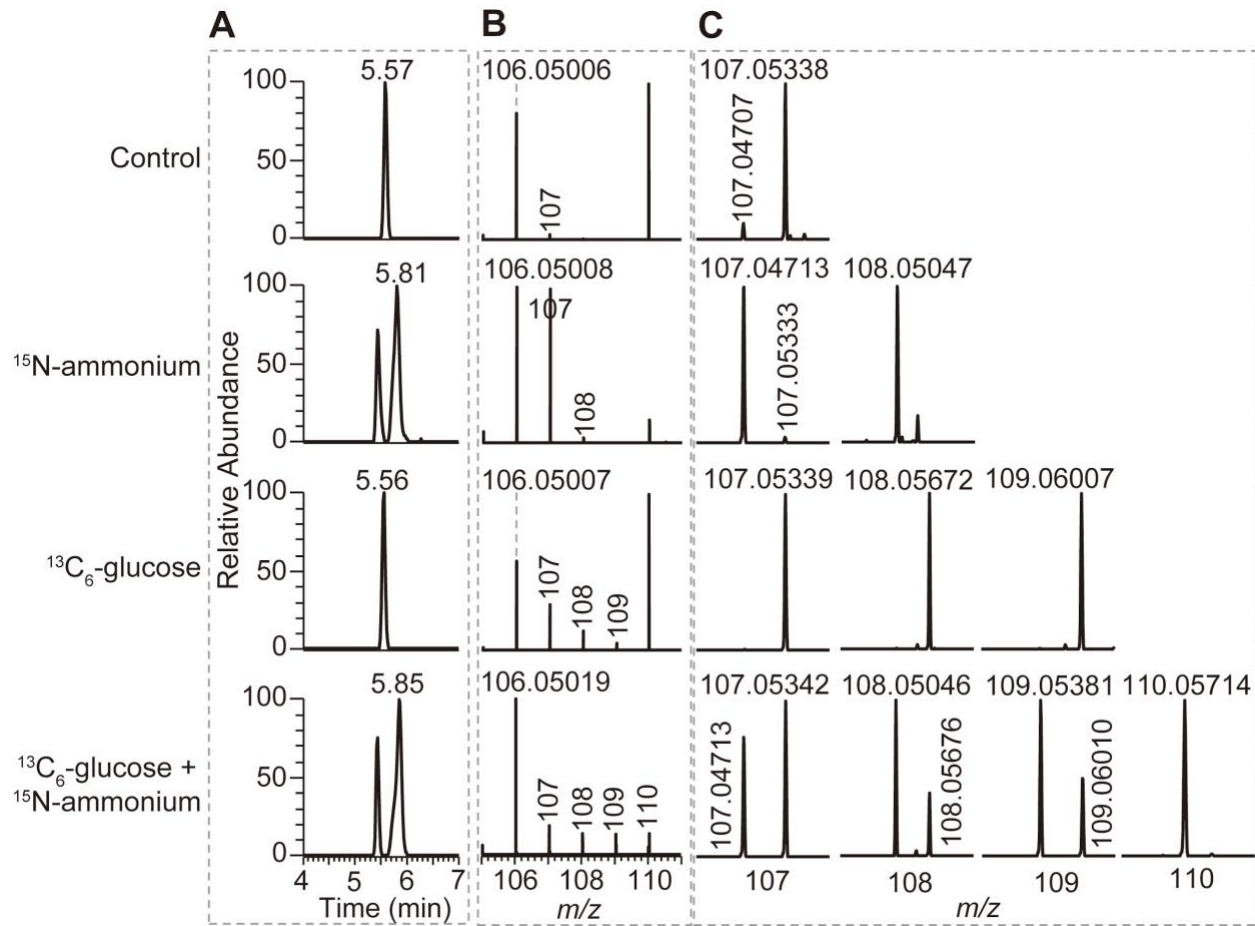

657

658

**Figure S19. Identification of serine isolated from symbiotic *C. andromeda*.**

659

(A, B) Extracted ion chromatograms (EIC) (A) and the isotopic distributions (B) of serine isolated from symbiotic *C. andromeda* at different conditions.

660

661

(C) The zoom of the area in (B) showing that different isotopologue compositions of serine are distinguished by HR-MS.

662

663

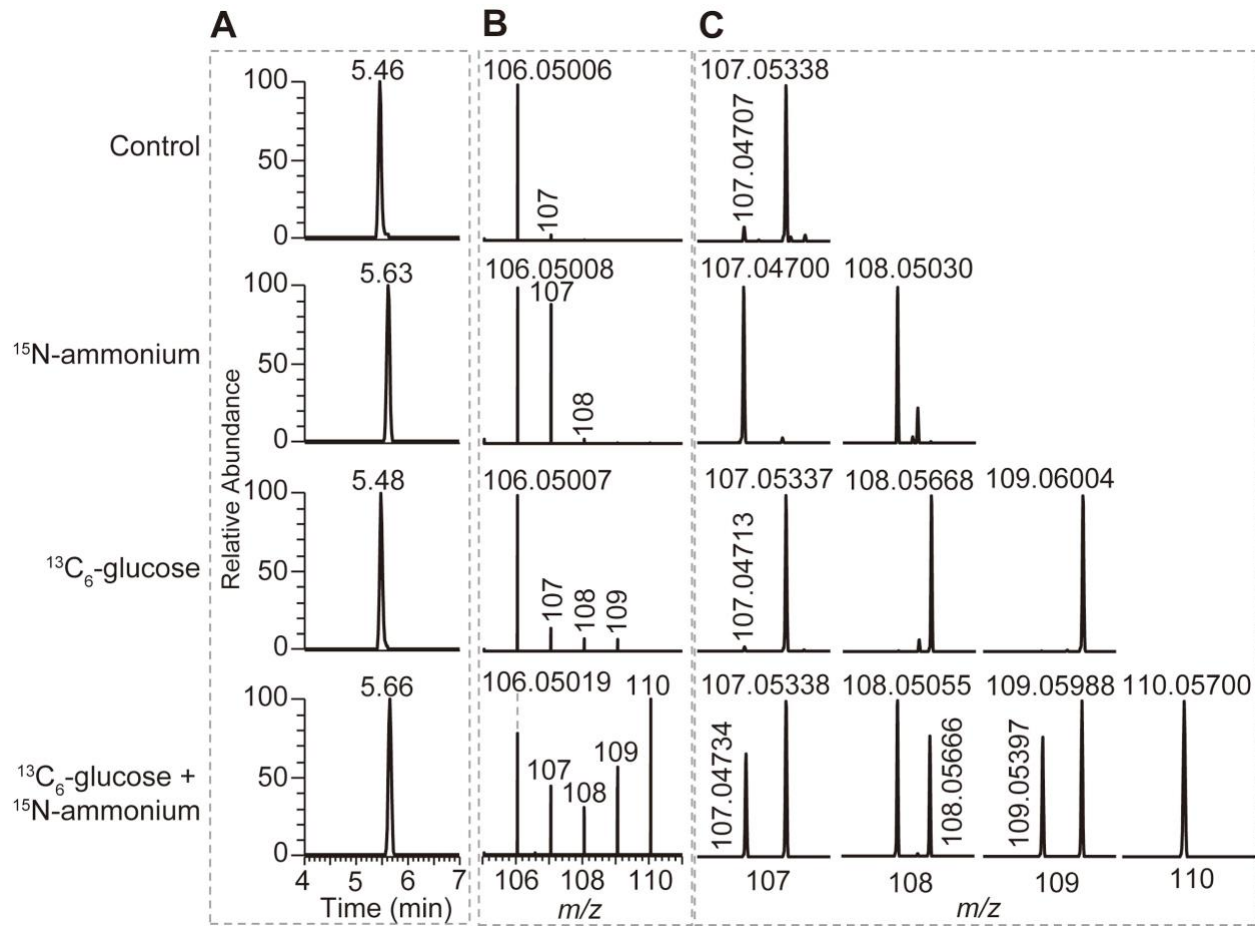

664

665 **Figure S20. Identification of serine isolated from symbiotic *E. diaphana*.**

666 (A, B) Extracted ion chromatograms (EIC) (A) and the isotopic distributions (B) of serine isolated from  
667 symbiotic *E. diaphana* at different conditions.

668 (C) The zoom of the area in (B) showing that different isotopologue compositions of serine are  
669 distinguished by HR-MS.

670

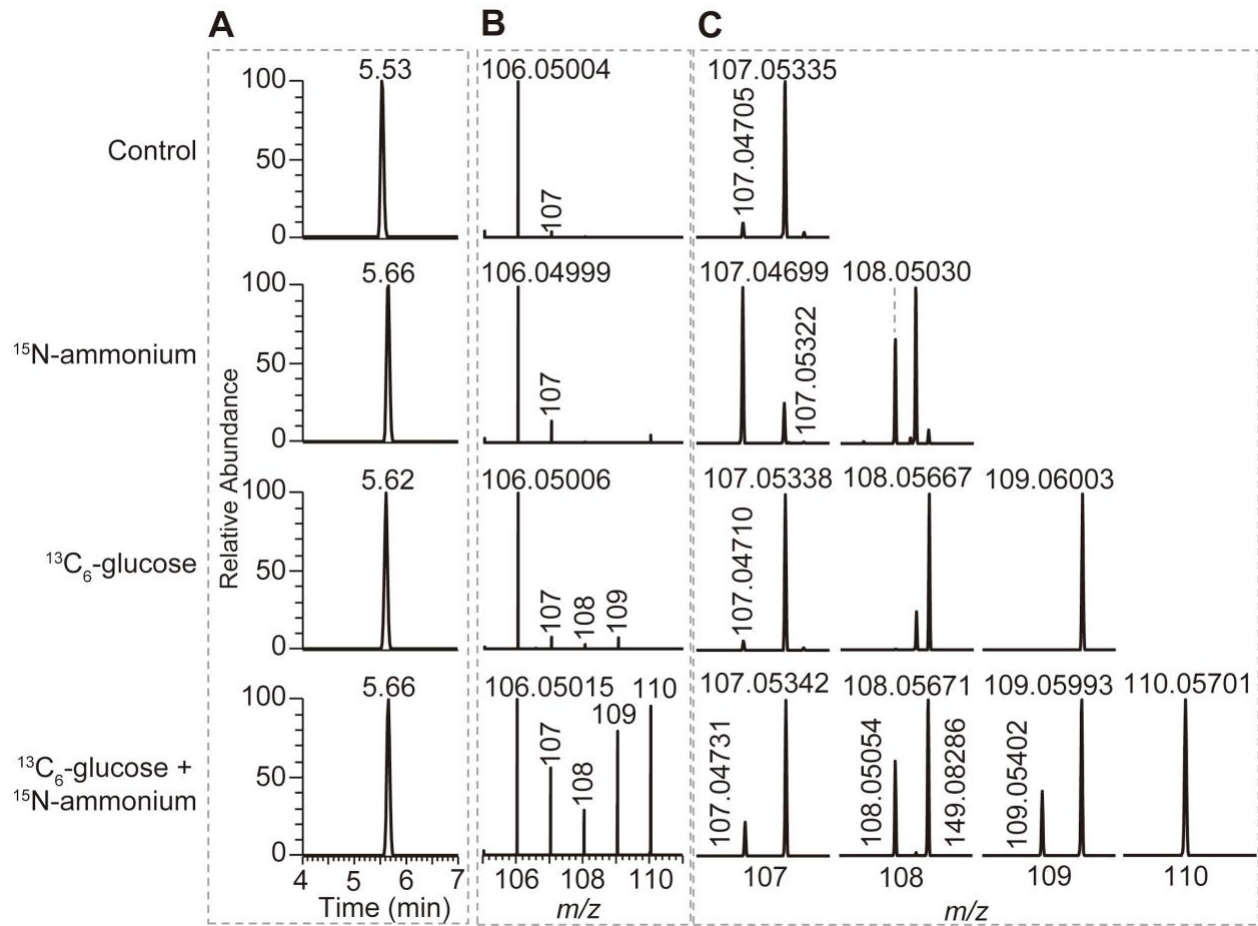

671

672

**Figure S21. Identification of serine isolated from aposymbiotic *E. diaphana*.**

673

(A, B) Extracted ion chromatograms (EIC) (A) and the isotopic distributions (B) of serine isolated from aposymbiotic *E. diaphana* at different conditions.

674

675

(C) The zoom of the area in (B) showing that different isotopologue compositions of serine are

676

distinguished by HR-MS.



677

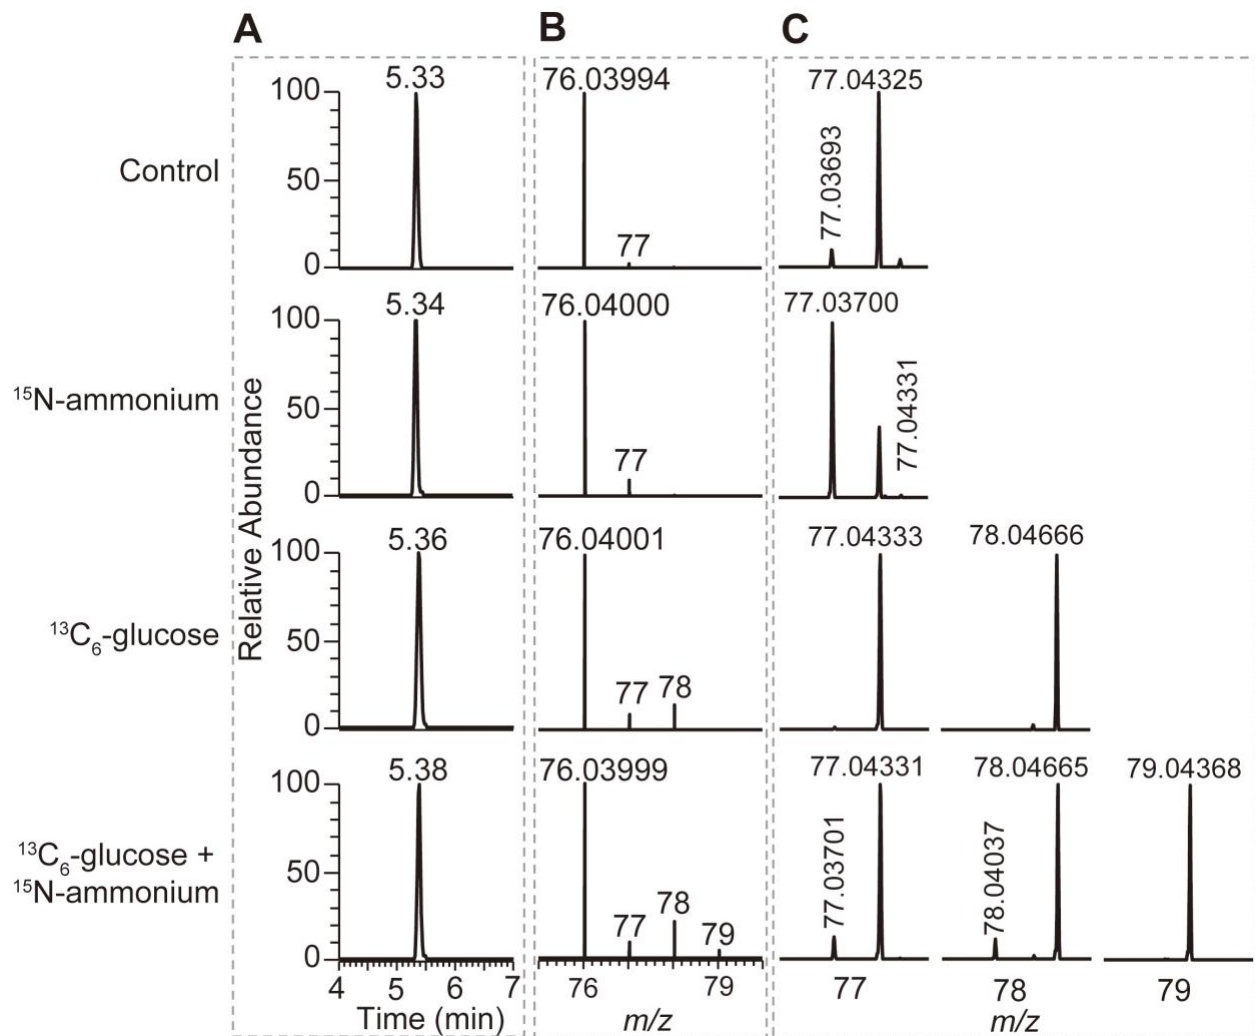

678

679 **Figure S22. Identification of glycine isolated from symbiotic *S. pistillata*.**

680 (A, B) Extracted ion chromatograms (EIC) (A) and the isotopic distributions (B) of glycine isolated from  
681 symbiotic *S. pistillata* at different conditions.

682 (C) The zoom of the area in (B) showing that different isotopologue compositions of glycine are  
683 distinguished by HR-MS.

684

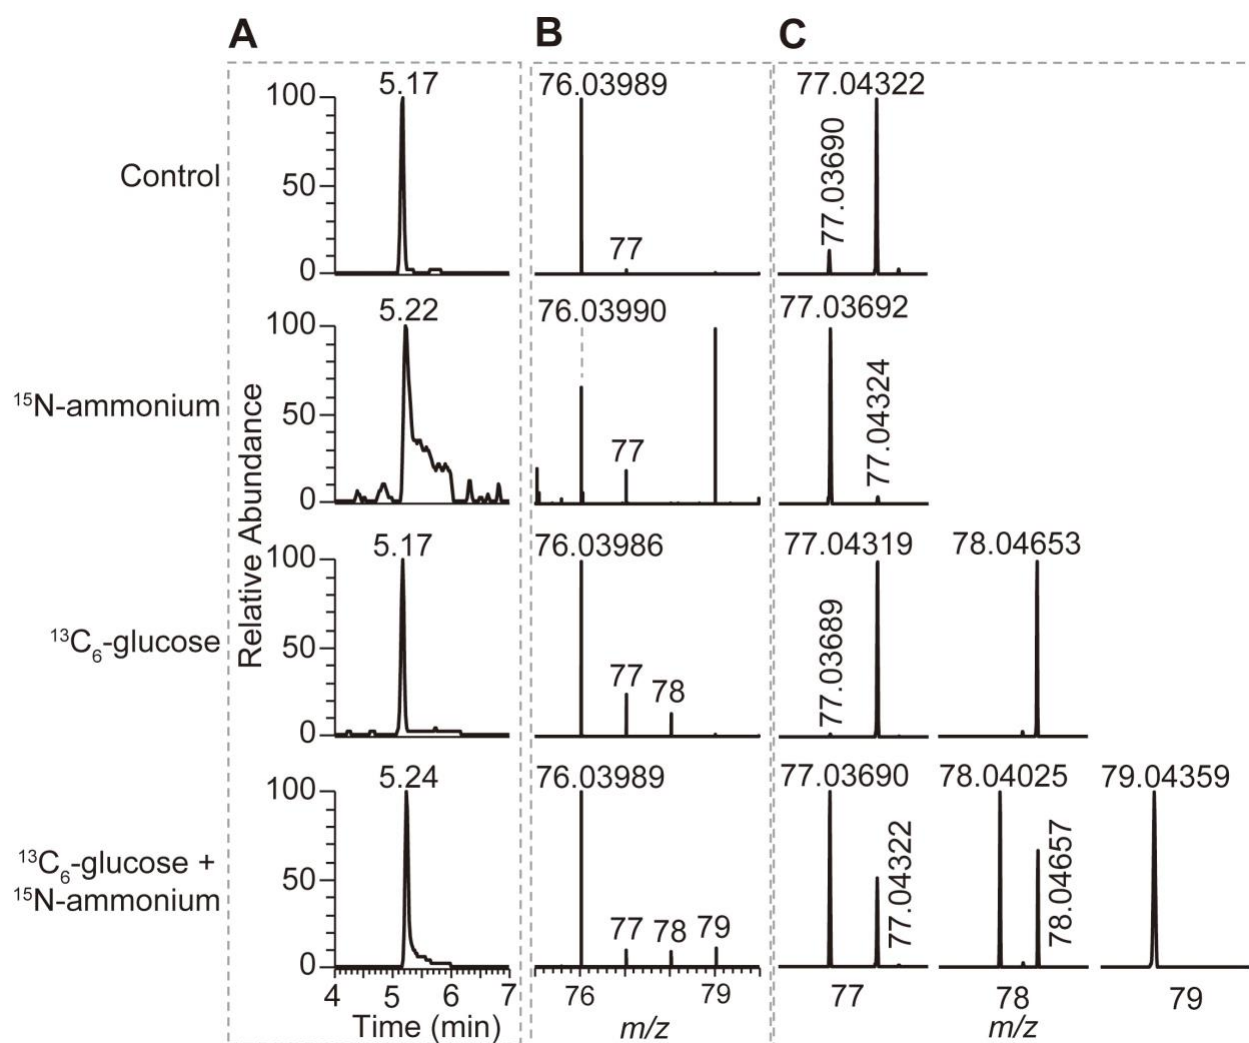

685

686 **Figure S23. Identification of glycine isolated from symbiotic *C. andromeda*.**

687 (A, B) Extracted ion chromatograms (EIC) (A) and the isotopic distributions (B) of glycine isolated from  
688 symbiotic *C. andromeda* at different conditions.

689 (C) The zoom of the area in (B) showing that different isotopologue compositions of glycine are  
690 distinguished by HR-MS.

691

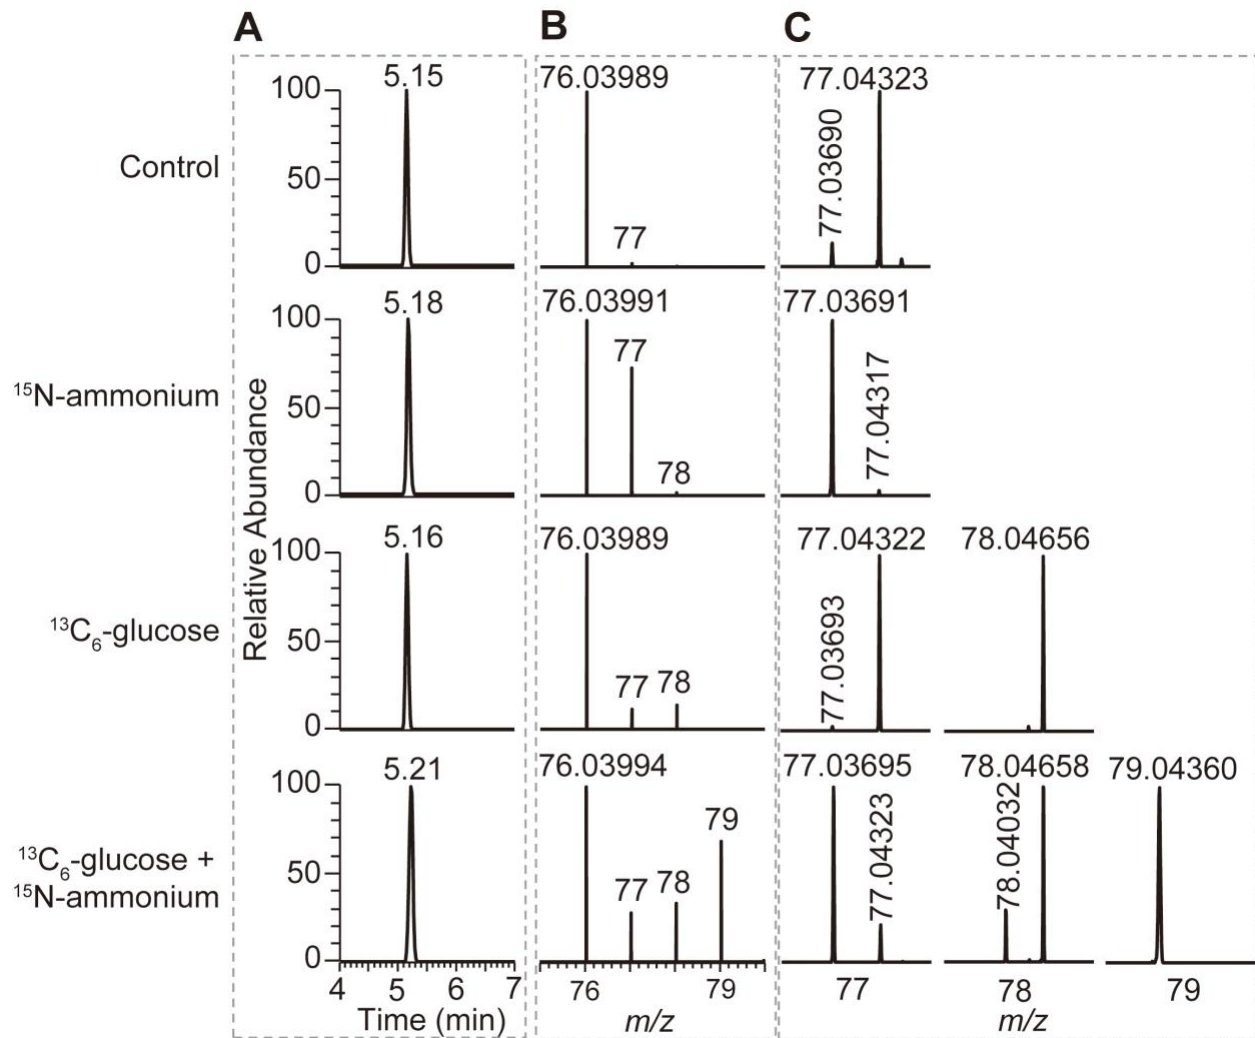

692

693 **Figure S24. Identification of glycine isolated from symbiotic *E. diaphana*.**

694 (A, B) Extracted ion chromatograms (EIC) (A) and the isotopic distributions (B) of glycine isolated from  
695 symbiotic *E. diaphana* at different conditions.

696 (C) The zoom of the area in (B) showing that different isotopologue compositions of glycine are  
697 distinguished by HR-MS.

698

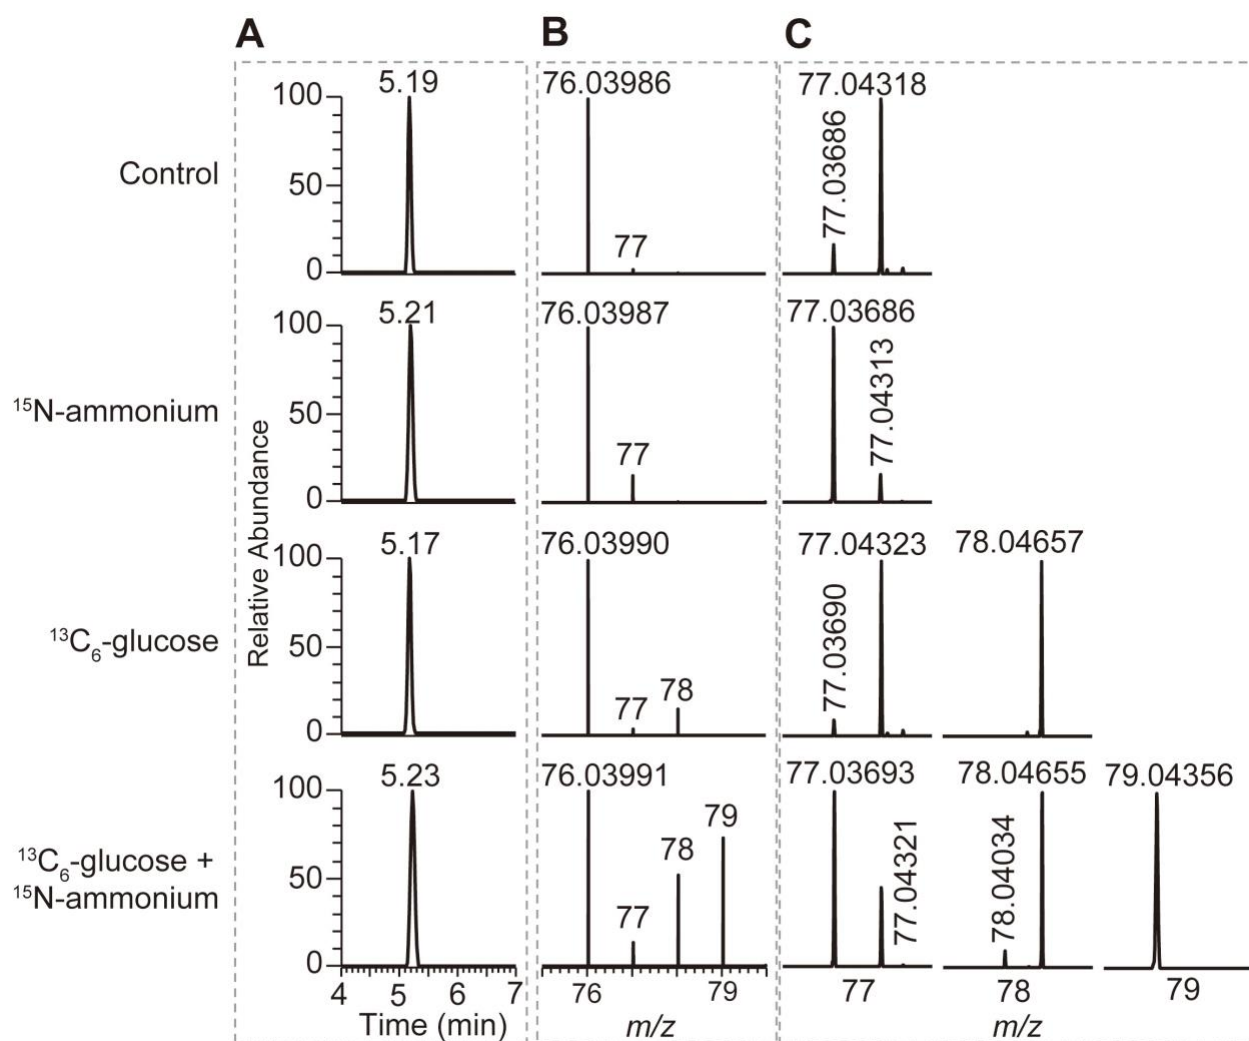

699

700 **Figure S25. Identification of glycine isolated from aposymbiotic *E. diaphana*.**

701 (A, B) Extracted ion chromatograms (EIC) (A) and the isotopic distributions (B) of glycine isolated from  
702 aposymbiotic *E. diaphana* at different conditions.

703 (C) The zoom of the area in (B) showing that different isotopologue compositions of glycine are  
704 distinguished by HR-MS.

705

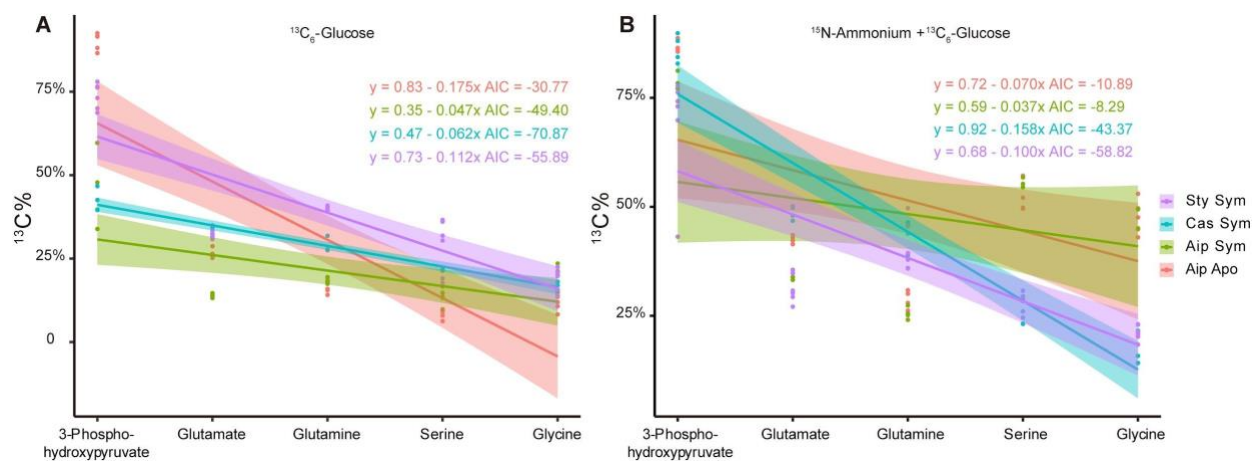

706

707

**Figure S26. Generalized linear model of  $^{13}\text{C}$  proportion in metabolites across the GS/GOGAT-**

708

**mediated amino acid synthesis pathway.**

709
